# Supplementary material for: Different distant metastasis patterns based on tumor size could be found in extensive-stage small cell lung cancer patients: a large, population-based SEER study
Source: PeerJ. 2019 Dec 3;7:e8163. doi: 10.7717/peerj.8163 (PMC6896937; doi:10.7717/peerj.8163)
Supplement: Supplemental Information 1 [file peerj-07-8163-s001.xlsx]

## Sheet: Sheet2
Age recode with <1 year olds	Race recode (1, 2, Other)	Sex	ICD-O-3 Hist/behav, malignant	Derived AJCC N, 7th ed (2010+)	CS tumor size (2004+)	CS mets at DX-bone (2010+)	CS mets at DX-brain (2010+)	CS mets at DX-liver (2010+)	CS mets at DX-lung (2010+)
1	1	2	8041/3: Small cell carcinoma, NOS	3	3	0	0	0	0
1	1	2	8041/3: Small cell carcinoma, NOS	3	3	0	0	0	0
1	1	2	8041/3: Small cell carcinoma, NOS	3	3	0	0	1	0
1	1	2	8041/3: Small cell carcinoma, NOS	1	3	0	0	0	0
1	1	1	8041/3: Small cell carcinoma, NOS	4	3	1	0	0	0
1	1	1	8041/3: Small cell carcinoma, NOS	4	3	1	1	0	0
1	1	1	8041/3: Small cell carcinoma, NOS	3	3	0	0	1	0
1	1	1	8041/3: Small cell carcinoma, NOS	3	3	1	0	1	0
1	1	1	8041/3: Small cell carcinoma, NOS	3	3	0	0	0	0
1	1	2	8041/3: Small cell carcinoma, NOS	4	3	1	0	0	0
1	1	1	8041/3: Small cell carcinoma, NOS	3	3	0	1	0	0
1	1	2	8041/3: Small cell carcinoma, NOS	3	3	1	1	0	0
1	1	1	8041/3: Small cell carcinoma, NOS	4	3	0	0	1	0
1	1	2	8041/3: Small cell carcinoma, NOS	4	3	1	0	1	0
1	1	1	8041/3: Small cell carcinoma, NOS	3	3	1	0	1	0
1	1	2	8041/3: Small cell carcinoma, NOS	3	3	0	0	0	0
1	1	1	8041/3: Small cell carcinoma, NOS	3	3	1	0	0	0
1	1	2	8041/3: Small cell carcinoma, NOS	3	3	1	0	0	0
1	1	1	8041/3: Small cell carcinoma, NOS	2	3	0	0	1	0
1	1	2	8041/3: Small cell carcinoma, NOS	3	3	0	0	0	1
1	1	2	8041/3: Small cell carcinoma, NOS	3	3	0	0	1	1
1	1	1	8041/3: Small cell carcinoma, NOS	3	3	0	0	1	1
1	1	2	8041/3: Small cell carcinoma, NOS	3	3	0	0	1	1
2	1	1	8041/3: Small cell carcinoma, NOS	4	3	0	0	0	0
2	1	2	8041/3: Small cell carcinoma, NOS	3	3	0	0	0	0
2	1	2	8041/3: Small cell carcinoma, NOS	4	3	1	0	0	0
2	1	1	8041/3: Small cell carcinoma, NOS	1	3	0	1	0	0
2	1	2	8041/3: Small cell carcinoma, NOS	1	3	0	1	0	0
2	1	1	8041/3: Small cell carcinoma, NOS	4	3	1	1	0	0
2	1	2	8041/3: Small cell carcinoma, NOS	3	3	0	0	1	0
2	1	2	8041/3: Small cell carcinoma, NOS	3	3	0	0	1	0
2	1	2	8041/3: Small cell carcinoma, NOS	3	3	0	0	1	0
2	1	1	8041/3: Small cell carcinoma, NOS	3	3	1	0	1	0
2	1	1	8041/3: Small cell carcinoma, NOS	3	3	0	0	0	1
2	1	1	8041/3: Small cell carcinoma, NOS	3	3	0	0	0	0
2	1	1	8041/3: Small cell carcinoma, NOS	3	3	0	0	0	0
2	1	1	8041/3: Small cell carcinoma, NOS	4	3	1	0	0	0
2	1	2	8041/3: Small cell carcinoma, NOS	1	3	0	0	1	0
2	1	2	8041/3: Small cell carcinoma, NOS	1	3	0	0	1	1
2	1	1	8041/3: Small cell carcinoma, NOS	3	3	1	0	1	1
2	1	1	8041/3: Small cell carcinoma, NOS	3	3	0	0	0	0
2	1	2	8041/3: Small cell carcinoma, NOS	3	3	0	0	0	0
2	1	1	8041/3: Small cell carcinoma, NOS	3	3	0	0	0	0
2	1	2	8041/3: Small cell carcinoma, NOS	3	3	1	0	0	0
2	1	1	8041/3: Small cell carcinoma, NOS	1	3	1	0	0	0
2	1	2	8041/3: Small cell carcinoma, NOS	3	3	0	0	0	1
2	1	2	8041/3: Small cell carcinoma, NOS	3	3	0	0	0	1
2	1	1	8041/3: Small cell carcinoma, NOS	3	3	0	0	0	0
2	1	2	8041/3: Small cell carcinoma, NOS	1	3	0	0	0	0
2	1	1	8041/3: Small cell carcinoma, NOS	3	3	0	1	0	0
2	1	2	8041/3: Small cell carcinoma, NOS	3	3	0	0	1	0
2	1	1	8041/3: Small cell carcinoma, NOS	3	3	0	0	1	0
2	1	1	8041/3: Small cell carcinoma, NOS	3	3	0	0	1	0
2	1	2	8041/3: Small cell carcinoma, NOS	3	3	1	0	1	0
2	1	1	8041/3: Small cell carcinoma, NOS	3	3	0	0	0	1
2	1	2	8041/3: Small cell carcinoma, NOS	3	3	0	0	1	1
2	1	1	8041/3: Small cell carcinoma, NOS	4	3	0	0	0	0
2	1	1	8041/3: Small cell carcinoma, NOS	1	3	0	0	0	0
2	1	1	8041/3: Small cell carcinoma, NOS	3	3	0	0	1	0
1	1	2	8041/3: Small cell carcinoma, NOS	4	3	1	0	0	0
1	1	2	8041/3: Small cell carcinoma, NOS	3	3	0	1	0	0
1	1	2	8041/3: Small cell carcinoma, NOS	3	3	0	0	1	0
1	1	1	8041/3: Small cell carcinoma, NOS	3	3	1	0	1	0
1	1	1	8041/3: Small cell carcinoma, NOS	2	3	0	0	0	0
1	1	2	8041/3: Small cell carcinoma, NOS	3	3	1	0	0	0
1	1	1	8041/3: Small cell carcinoma, NOS	3	3	1	0	0	0
1	1	2	8041/3: Small cell carcinoma, NOS	2	3	0	1	0	0
1	1	2	8041/3: Small cell carcinoma, NOS	3	3	0	0	1	0
1	1	2	8041/3: Small cell carcinoma, NOS	3	3	0	0	1	0
1	1	1	8041/3: Small cell carcinoma, NOS	3	3	1	1	1	0
1	1	1	8041/3: Small cell carcinoma, NOS	4	3	0	0	0	1
1	1	1	8041/3: Small cell carcinoma, NOS	3	3	0	0	0	0
1	1	1	8041/3: Small cell carcinoma, NOS	3	3	0	0	0	0
1	1	1	8041/3: Small cell carcinoma, NOS	3	3	0	0	0	0
1	1	2	8041/3: Small cell carcinoma, NOS	3	3	0	0	0	0
1	1	1	8041/3: Small cell carcinoma, NOS	4	3	0	1	0	0
1	1	2	8041/3: Small cell carcinoma, NOS	4	3	0	1	0	0
1	1	2	8041/3: Small cell carcinoma, NOS	3	3	0	1	0	0
1	1	1	8041/3: Small cell carcinoma, NOS	3	3	0	1	0	0
1	1	2	8041/3: Small cell carcinoma, NOS	1	3	0	1	0	0
1	1	1	8041/3: Small cell carcinoma, NOS	3	3	0	0	1	0
1	1	2	8041/3: Small cell carcinoma, NOS	2	3	0	0	1	0
1	1	2	8041/3: Small cell carcinoma, NOS	1	3	0	0	1	0
1	1	1	8041/3: Small cell carcinoma, NOS	3	3	1	0	1	0
1	1	1	8041/3: Small cell carcinoma, NOS	3	3	1	0	1	0
1	1	1	8041/3: Small cell carcinoma, NOS	3	3	1	1	1	0
1	1	1	8041/3: Small cell carcinoma, NOS	2	3	1	1	1	0
1	1	1	8041/3: Small cell carcinoma, NOS	3	3	0	0	0	1
1	1	2	8041/3: Small cell carcinoma, NOS	3	3	1	0	1	1
2	1	2	8041/3: Small cell carcinoma, NOS	3	3	0	0	0	0
2	1	2	8041/3: Small cell carcinoma, NOS	3	3	0	0	0	0
2	1	2	8041/3: Small cell carcinoma, NOS	3	3	0	0	0	0
2	1	2	8041/3: Small cell carcinoma, NOS	3	3	0	0	0	0
2	1	1	8041/3: Small cell carcinoma, NOS	4	3	1	0	0	0
2	1	2	8041/3: Small cell carcinoma, NOS	3	3	1	0	0	0
2	1	2	8041/3: Small cell carcinoma, NOS	3	3	1	0	0	0
2	1	1	8041/3: Small cell carcinoma, NOS	1	3	1	0	0	0
2	1	1	8041/3: Small cell carcinoma, NOS	1	3	0	0	1	0
2	1	2	8041/3: Small cell carcinoma, NOS	4	3	1	0	1	0
2	1	2	8041/3: Small cell carcinoma, NOS	3	3	1	0	1	0
2	1	2	8041/3: Small cell carcinoma, NOS	1	3	1	0	1	0
2	1	2	8041/3: Small cell carcinoma, NOS	4	3	1	1	1	0
2	1	2	8041/3: Small cell carcinoma, NOS	2	3	0	0	0	1
2	1	2	8041/3: Small cell carcinoma, NOS	4	3	0	0	0	0
2	1	2	8041/3: Small cell carcinoma, NOS	4	3	0	0	0	0
2	1	1	8041/3: Small cell carcinoma, NOS	3	3	0	0	0	0
2	1	1	8041/3: Small cell carcinoma, NOS	3	3	1	0	0	0
2	1	2	8041/3: Small cell carcinoma, NOS	3	3	0	0	1	0
2	1	1	8041/3: Small cell carcinoma, NOS	3	3	1	1	1	0
2	1	1	8041/3: Small cell carcinoma, NOS	3	3	0	0	0	1
2	1	1	8041/3: Small cell carcinoma, NOS	1	3	0	0	1	1
2	1	2	8041/3: Small cell carcinoma, NOS	4	3	0	1	0	0
2	1	2	8041/3: Small cell carcinoma, NOS	3	3	0	0	1	0
2	1	1	8041/3: Small cell carcinoma, NOS	3	3	1	0	1	0
2	1	1	8041/3: Small cell carcinoma, NOS	3	3	0	0	0	1
2	1	2	8041/3: Small cell carcinoma, NOS	3	3	1	0	1	1
2	1	2	8041/3: Small cell carcinoma, NOS	3	3	0	0	1	1
2	1	1	8041/3: Small cell carcinoma, NOS	3	3	1	0	0	0
2	1	2	8041/3: Small cell carcinoma, NOS	3	3	0	0	1	0
1	1	1	8041/3: Small cell carcinoma, NOS	3	3	0	0	0	0
1	1	2	8041/3: Small cell carcinoma, NOS	1	3	0	0	0	0
1	1	2	8041/3: Small cell carcinoma, NOS	3	3	1	0	1	0
1	1	2	8041/3: Small cell carcinoma, NOS	4	3	0	1	0	1
1	1	2	8041/3: Small cell carcinoma, NOS	4	3	1	1	1	1
1	1	1	8041/3: Small cell carcinoma, NOS	4	3	0	0	0	0
1	1	1	8041/3: Small cell carcinoma, NOS	4	3	0	0	0	0
1	1	1	8041/3: Small cell carcinoma, NOS	3	3	0	0	0	0
1	1	1	8041/3: Small cell carcinoma, NOS	3	3	0	0	0	0
1	1	1	8041/3: Small cell carcinoma, NOS	4	3	1	0	0	0
1	1	2	8041/3: Small cell carcinoma, NOS	4	3	1	0	0	0
1	1	2	8041/3: Small cell carcinoma, NOS	4	3	1	0	0	0
1	1	1	8041/3: Small cell carcinoma, NOS	4	3	0	1	0	0
1	1	2	8041/3: Small cell carcinoma, NOS	3	3	1	1	0	0
1	1	1	8041/3: Small cell carcinoma, NOS	4	3	0	0	1	0
1	1	2	8041/3: Small cell carcinoma, NOS	4	3	0	0	1	0
1	1	2	8041/3: Small cell carcinoma, NOS	1	3	0	0	1	0
1	1	1	8041/3: Small cell carcinoma, NOS	4	3	1	0	1	0
1	1	2	8041/3: Small cell carcinoma, NOS	3	3	0	1	1	0
1	1	2	8041/3: Small cell carcinoma, NOS	1	3	0	1	1	0
1	1	1	8041/3: Small cell carcinoma, NOS	4	3	1	1	0	1
1	1	2	8041/3: Small cell carcinoma, NOS	4	3	0	0	1	1
1	1	2	8041/3: Small cell carcinoma, NOS	3	3	1	0	1	1
1	1	1	8041/3: Small cell carcinoma, NOS	4	3	0	0	0	0
1	1	1	8041/3: Small cell carcinoma, NOS	3	3	0	0	0	0
1	1	1	8041/3: Small cell carcinoma, NOS	1	3	0	1	0	0
1	1	2	8041/3: Small cell carcinoma, NOS	3	3	0	1	1	0
1	1	1	8041/3: Small cell carcinoma, NOS	3	3	1	1	1	0
1	1	2	8041/3: Small cell carcinoma, NOS	4	3	0	0	0	1
2	1	1	8041/3: Small cell carcinoma, NOS	3	3	0	0	0	0
2	1	2	8041/3: Small cell carcinoma, NOS	1	3	0	0	0	0
2	1	2	8041/3: Small cell carcinoma, NOS	4	3	1	0	0	0
2	1	2	8041/3: Small cell carcinoma, NOS	4	3	1	0	0	0
2	1	2	8041/3: Small cell carcinoma, NOS	4	3	1	0	0	0
2	1	2	8041/3: Small cell carcinoma, NOS	3	3	0	0	1	0
2	1	2	8041/3: Small cell carcinoma, NOS	3	3	0	0	1	0
2	1	2	8041/3: Small cell carcinoma, NOS	3	3	0	0	1	0
2	1	1	8041/3: Small cell carcinoma, NOS	3	3	1	1	1	0
2	1	1	8041/3: Small cell carcinoma, NOS	3	3	1	0	0	1
2	1	1	8041/3: Small cell carcinoma, NOS	3	3	0	1	1	1
2	1	1	8041/3: Small cell carcinoma, NOS	4	3	0	0	0	0
2	1	1	8041/3: Small cell carcinoma, NOS	3	3	0	0	0	0
2	1	2	8041/3: Small cell carcinoma, NOS	3	3	0	0	0	0
2	1	2	8041/3: Small cell carcinoma, NOS	3	3	1	0	0	0
2	1	2	8041/3: Small cell carcinoma, NOS	2	3	1	0	0	0
2	1	1	8041/3: Small cell carcinoma, NOS	3	3	0	1	0	0
2	1	2	8041/3: Small cell carcinoma, NOS	3	3	0	1	0	0
2	1	2	8041/3: Small cell carcinoma, NOS	3	3	1	1	0	0
2	1	1	8041/3: Small cell carcinoma, NOS	3	3	0	0	1	0
2	1	2	8041/3: Small cell carcinoma, NOS	2	3	1	0	1	0
2	1	1	8041/3: Small cell carcinoma, NOS	2	3	1	0	0	1
2	1	1	8041/3: Small cell carcinoma, NOS	3	3	0	0	0	0
2	1	1	8041/3: Small cell carcinoma, NOS	3	3	0	0	1	0
2	1	2	8041/3: Small cell carcinoma, NOS	3	3	1	0	1	0
2	1	1	8041/3: Small cell carcinoma, NOS	3	3	1	0	1	0
2	1	1	8041/3: Small cell carcinoma, NOS	3	3	0	0	0	1
2	1	1	8041/3: Small cell carcinoma, NOS	3	3	0	0	0	1
2	1	2	8041/3: Small cell carcinoma, NOS	4	3	1	0	1	1
2	1	2	8041/3: Small cell carcinoma, NOS	3	3	0	0	0	0
2	1	2	8041/3: Small cell carcinoma, NOS	1	3	0	0	0	0
2	1	1	8041/3: Small cell carcinoma, NOS	3	3	1	0	0	0
2	1	1	8041/3: Small cell carcinoma, NOS	3	3	1	0	0	0
2	1	2	8041/3: Small cell carcinoma, NOS	3	3	0	0	1	0
2	1	2	8041/3: Small cell carcinoma, NOS	4	3	1	0	1	0
2	1	2	8041/3: Small cell carcinoma, NOS	1	3	0	0	0	1
2	1	1	8041/3: Small cell carcinoma, NOS	3	3	0	0	0	0
2	1	2	8041/3: Small cell carcinoma, NOS	3	3	0	0	0	0
2	1	2	8041/3: Small cell carcinoma, NOS	3	3	0	0	1	0
1	1	2	8041/3: Small cell carcinoma, NOS	4	3	0	0	0	0
1	1	2	8041/3: Small cell carcinoma, NOS	3	3	1	0	1	0
1	1	2	8041/3: Small cell carcinoma, NOS	1	3	0	0	1	0
1	1	1	8041/3: Small cell carcinoma, NOS	4	3	0	0	0	0
1	1	1	8041/3: Small cell carcinoma, NOS	3	3	0	1	0	0
1	1	2	8041/3: Small cell carcinoma, NOS	1	3	0	1	0	0
1	1	2	8041/3: Small cell carcinoma, NOS	3	3	0	0	1	0
1	1	1	8041/3: Small cell carcinoma, NOS	3	3	0	0	0	1
1	1	2	8041/3: Small cell carcinoma, NOS	4	3	1	0	1	1
1	1	2	8041/3: Small cell carcinoma, NOS	3	3	0	0	0	0
1	1	2	8041/3: Small cell carcinoma, NOS	1	3	0	0	0	0
1	1	2	8041/3: Small cell carcinoma, NOS	4	3	1	0	0	0
1	1	1	8041/3: Small cell carcinoma, NOS	4	3	0	1	0	0
1	1	2	8041/3: Small cell carcinoma, NOS	1	3	0	1	0	0
1	1	1	8041/3: Small cell carcinoma, NOS	3	3	0	0	1	0
1	1	1	8041/3: Small cell carcinoma, NOS	3	3	0	1	1	0
1	1	1	8041/3: Small cell carcinoma, NOS	4	3	1	1	1	0
1	1	2	8041/3: Small cell carcinoma, NOS	1	3	0	1	0	1
1	1	1	8041/3: Small cell carcinoma, NOS	4	3	1	1	1	1
1	1	1	8041/3: Small cell carcinoma, NOS	4	3	1	0	0	0
1	1	2	8041/3: Small cell carcinoma, NOS	4	3	1	0	0	0
1	1	1	8041/3: Small cell carcinoma, NOS	3	3	1	0	0	0
1	1	1	8041/3: Small cell carcinoma, NOS	3	3	0	1	0	0
1	1	1	8041/3: Small cell carcinoma, NOS	3	3	0	0	1	0
1	1	2	8041/3: Small cell carcinoma, NOS	3	3	0	0	1	0
1	1	2	8041/3: Small cell carcinoma, NOS	3	3	1	0	1	0
1	1	1	8041/3: Small cell carcinoma, NOS	3	3	1	0	1	0
1	1	2	8041/3: Small cell carcinoma, NOS	3	3	1	1	1	0
1	1	2	8041/3: Small cell carcinoma, NOS	3	3	0	0	1	1
2	1	1	8041/3: Small cell carcinoma, NOS	3	3	0	0	0	0
2	1	2	8041/3: Small cell carcinoma, NOS	3	3	0	0	0	0
2	1	1	8041/3: Small cell carcinoma, NOS	3	3	0	0	0	0
2	1	1	8041/3: Small cell carcinoma, NOS	4	3	1	0	0	0
2	1	2	8041/3: Small cell carcinoma, NOS	3	3	1	0	0	0
2	1	2	8041/3: Small cell carcinoma, NOS	4	3	0	0	1	0
2	1	1	8041/3: Small cell carcinoma, NOS	4	3	1	0	1	0
2	1	2	8041/3: Small cell carcinoma, NOS	3	3	1	0	1	0
2	1	1	8041/3: Small cell carcinoma, NOS	2	3	1	0	1	0
2	1	1	8041/3: Small cell carcinoma, NOS	3	3	1	1	1	0
2	1	2	8041/3: Small cell carcinoma, NOS	4	3	0	0	0	1
2	1	1	8041/3: Small cell carcinoma, NOS	3	3	0	0	0	1
2	1	2	8041/3: Small cell carcinoma, NOS	3	3	1	0	1	1
2	1	1	8041/3: Small cell carcinoma, NOS	3	3	1	1	1	1
2	1	2	8041/3: Small cell carcinoma, NOS	4	3	0	0	0	0
2	1	1	8041/3: Small cell carcinoma, NOS	4	3	0	0	0	0
2	1	2	8041/3: Small cell carcinoma, NOS	4	3	1	0	0	0
2	1	1	8041/3: Small cell carcinoma, NOS	1	3	0	0	1	1
2	1	2	8041/3: Small cell carcinoma, NOS	3	3	1	0	1	1
2	1	2	8041/3: Small cell carcinoma, NOS	3	3	0	0	0	0
2	1	2	8041/3: Small cell carcinoma, NOS	1	3	0	0	0	0
2	1	1	8041/3: Small cell carcinoma, NOS	3	3	1	0	0	0
2	1	1	8041/3: Small cell carcinoma, NOS	1	3	0	1	0	0
2	1	2	8041/3: Small cell carcinoma, NOS	3	3	0	0	1	0
2	1	2	8041/3: Small cell carcinoma, NOS	1	3	0	0	0	0
2	1	2	8041/3: Small cell carcinoma, NOS	3	3	0	0	1	0
2	1	1	8041/3: Small cell carcinoma, NOS	3	3	0	1	0	1
2	1	2	8041/3: Small cell carcinoma, NOS	3	3	0	0	1	1
2	1	1	8041/3: Small cell carcinoma, NOS	4	3	1	0	1	1
2	1	1	8041/3: Small cell carcinoma, NOS	3	3	1	0	1	1
2	1	1	8041/3: Small cell carcinoma, NOS	3	3	0	0	0	0
2	1	2	8041/3: Small cell carcinoma, NOS	3	3	1	1	1	1
1	1	2	8041/3: Small cell carcinoma, NOS	3	3	1	0	0	0
1	1	2	8041/3: Small cell carcinoma, NOS	4	3	0	0	0	0
1	1	1	8041/3: Small cell carcinoma, NOS	3	3	1	0	0	0
1	1	2	8041/3: Small cell carcinoma, NOS	4	3	0	1	0	0
1	1	1	8041/3: Small cell carcinoma, NOS	3	3	0	0	1	0
1	1	2	8041/3: Small cell carcinoma, NOS	3	3	0	0	0	1
1	1	2	8041/3: Small cell carcinoma, NOS	4	3	0	0	0	0
1	1	1	8041/3: Small cell carcinoma, NOS	4	3	0	0	0	0
1	1	1	8041/3: Small cell carcinoma, NOS	3	3	0	0	0	0
1	1	2	8041/3: Small cell carcinoma, NOS	4	3	1	0	0	0
1	1	1	8041/3: Small cell carcinoma, NOS	4	3	0	1	0	0
1	1	1	8041/3: Small cell carcinoma, NOS	3	3	0	1	0	0
1	1	2	8041/3: Small cell carcinoma, NOS	3	3	0	1	0	0
1	1	2	8041/3: Small cell carcinoma, NOS	3	3	0	0	1	0
1	1	1	8041/3: Small cell carcinoma, NOS	1	3	0	0	1	0
1	1	1	8041/3: Small cell carcinoma, NOS	3	3	1	0	1	0
1	1	2	8041/3: Small cell carcinoma, NOS	3	3	0	1	1	0
1	1	1	8041/3: Small cell carcinoma, NOS	4	3	1	1	1	0
1	1	2	8041/3: Small cell carcinoma, NOS	3	3	1	1	1	0
1	1	1	8041/3: Small cell carcinoma, NOS	4	3	0	0	0	0
1	1	2	8041/3: Small cell carcinoma, NOS	2	3	0	0	0	0
1	1	2	8041/3: Small cell carcinoma, NOS	3	3	1	0	0	0
1	1	1	8041/3: Small cell carcinoma, NOS	3	3	0	1	0	0
1	1	2	8041/3: Small cell carcinoma, NOS	4	3	1	1	0	0
1	1	1	8041/3: Small cell carcinoma, NOS	4	3	0	0	1	0
1	1	1	8041/3: Small cell carcinoma, NOS	4	3	0	0	1	0
1	1	2	8041/3: Small cell carcinoma, NOS	3	3	0	0	1	0
1	1	1	8041/3: Small cell carcinoma, NOS	2	3	0	1	1	0
1	1	1	8041/3: Small cell carcinoma, NOS	3	3	1	1	1	0
1	1	2	8041/3: Small cell carcinoma, NOS	3	3	0	0	0	1
1	1	1	8041/3: Small cell carcinoma, NOS	3	3	0	0	0	1
1	1	1	8041/3: Small cell carcinoma, NOS	2	3	0	0	0	1
1	1	1	8041/3: Small cell carcinoma, NOS	2	3	0	0	0	1
1	1	2	8041/3: Small cell carcinoma, NOS	4	3	1	0	1	1
1	1	2	8041/3: Small cell carcinoma, NOS	4	3	0	0	0	0
1	1	1	8041/3: Small cell carcinoma, NOS	3	3	0	0	0	0
1	1	1	8041/3: Small cell carcinoma, NOS	3	3	0	0	0	0
1	1	1	8041/3: Small cell carcinoma, NOS	3	3	0	1	0	0
1	1	1	8041/3: Small cell carcinoma, NOS	3	3	1	1	0	0
1	1	2	8041/3: Small cell carcinoma, NOS	1	3	0	0	1	0
1	1	2	8041/3: Small cell carcinoma, NOS	1	3	0	0	1	0
1	1	2	8041/3: Small cell carcinoma, NOS	4	3	1	0	1	0
1	1	1	8041/3: Small cell carcinoma, NOS	4	3	1	1	1	0
1	1	2	8041/3: Small cell carcinoma, NOS	2	3	1	1	1	0
1	1	1	8041/3: Small cell carcinoma, NOS	1	3	0	0	0	1
1	1	2	8041/3: Small cell carcinoma, NOS	3	3	1	0	1	1
2	1	1	8041/3: Small cell carcinoma, NOS	4	3	0	0	0	0
2	1	2	8041/3: Small cell carcinoma, NOS	4	3	0	0	0	0
2	1	2	8041/3: Small cell carcinoma, NOS	3	3	0	0	0	0
2	1	1	8041/3: Small cell carcinoma, NOS	3	3	0	0	0	0
2	1	2	8041/3: Small cell carcinoma, NOS	3	3	0	0	0	0
2	1	2	8041/3: Small cell carcinoma, NOS	3	3	0	0	0	0
2	1	1	8041/3: Small cell carcinoma, NOS	1	3	1	0	0	0
2	1	1	8041/3: Small cell carcinoma, NOS	3	3	0	1	0	0
2	1	2	8041/3: Small cell carcinoma, NOS	3	3	0	1	0	0
2	1	2	8041/3: Small cell carcinoma, NOS	1	3	0	1	0	0
2	1	2	8041/3: Small cell carcinoma, NOS	3	3	1	1	0	0
2	1	1	8041/3: Small cell carcinoma, NOS	4	3	0	0	1	0
2	1	2	8041/3: Small cell carcinoma, NOS	4	3	0	0	1	0
2	1	2	8041/3: Small cell carcinoma, NOS	3	3	0	0	1	0
2	1	1	8041/3: Small cell carcinoma, NOS	3	3	1	0	1	0
2	1	1	8041/3: Small cell carcinoma, NOS	3	3	1	0	1	0
2	1	2	8041/3: Small cell carcinoma, NOS	3	3	1	0	1	0
2	1	1	8041/3: Small cell carcinoma, NOS	4	3	1	1	1	0
2	1	2	8041/3: Small cell carcinoma, NOS	1	3	1	1	1	0
2	1	1	8041/3: Small cell carcinoma, NOS	1	3	1	0	0	1
2	1	1	8041/3: Small cell carcinoma, NOS	4	3	0	0	1	1
2	1	1	8041/3: Small cell carcinoma, NOS	4	3	0	0	1	1
2	1	1	8041/3: Small cell carcinoma, NOS	4	3	0	1	1	1
2	1	2	8041/3: Small cell carcinoma, NOS	4	3	0	0	0	0
2	1	2	8041/3: Small cell carcinoma, NOS	3	3	0	0	0	0
2	1	1	8041/3: Small cell carcinoma, NOS	3	3	0	0	0	0
2	1	1	8041/3: Small cell carcinoma, NOS	2	3	0	0	0	0
2	1	2	8041/3: Small cell carcinoma, NOS	1	3	0	0	0	0
2	1	2	8041/3: Small cell carcinoma, NOS	4	3	1	0	0	0
2	1	2	8041/3: Small cell carcinoma, NOS	1	3	1	0	0	0
2	1	1	8041/3: Small cell carcinoma, NOS	3	3	0	1	0	0
2	1	1	8041/3: Small cell carcinoma, NOS	4	3	0	0	1	0
2	1	1	8041/3: Small cell carcinoma, NOS	3	3	0	0	1	0
2	1	2	8041/3: Small cell carcinoma, NOS	3	3	0	1	1	0
2	1	2	8041/3: Small cell carcinoma, NOS	2	3	0	1	1	0
2	1	1	8041/3: Small cell carcinoma, NOS	4	3	0	0	0	1
2	1	1	8041/3: Small cell carcinoma, NOS	4	3	0	0	1	1
2	1	1	8041/3: Small cell carcinoma, NOS	1	3	1	0	1	1
2	1	2	8041/3: Small cell carcinoma, NOS	3	3	1	1	1	1
2	1	2	8041/3: Small cell carcinoma, NOS	4	3	0	0	0	0
2	1	1	8041/3: Small cell carcinoma, NOS	4	3	0	0	0	0
2	1	2	8041/3: Small cell carcinoma, NOS	3	3	0	0	0	0
2	1	1	8041/3: Small cell carcinoma, NOS	3	3	0	0	0	0
2	1	2	8041/3: Small cell carcinoma, NOS	3	3	0	0	0	0
2	1	1	8041/3: Small cell carcinoma, NOS	3	3	0	0	0	0
2	1	2	8041/3: Small cell carcinoma, NOS	3	3	0	0	0	0
2	1	1	8041/3: Small cell carcinoma, NOS	1	3	0	0	0	0
2	1	2	8041/3: Small cell carcinoma, NOS	1	3	0	1	0	0
2	1	2	8041/3: Small cell carcinoma, NOS	4	3	1	1	0	0
2	1	1	8041/3: Small cell carcinoma, NOS	3	3	1	1	0	0
2	1	1	8041/3: Small cell carcinoma, NOS	4	3	0	0	1	0
2	1	1	8041/3: Small cell carcinoma, NOS	3	3	0	0	1	0
2	1	1	8041/3: Small cell carcinoma, NOS	3	3	0	0	1	0
2	1	2	8041/3: Small cell carcinoma, NOS	3	3	0	0	1	0
2	1	2	8041/3: Small cell carcinoma, NOS	4	3	1	1	1	0
2	1	1	8041/3: Small cell carcinoma, NOS	4	3	0	0	0	1
2	1	1	8041/3: Small cell carcinoma, NOS	3	3	0	0	0	1
2	1	1	8041/3: Small cell carcinoma, NOS	3	3	0	0	0	1
2	1	2	8041/3: Small cell carcinoma, NOS	3	3	1	0	0	1
2	1	2	8041/3: Small cell carcinoma, NOS	3	3	1	1	1	1
2	1	1	8041/3: Small cell carcinoma, NOS	3	3	0	0	0	0
2	1	1	8041/3: Small cell carcinoma, NOS	3	3	0	1	0	0
2	1	1	8041/3: Small cell carcinoma, NOS	3	3	0	1	0	0
2	1	1	8041/3: Small cell carcinoma, NOS	2	3	0	0	1	0
2	1	2	8041/3: Small cell carcinoma, NOS	2	3	0	0	1	0
2	1	1	8041/3: Small cell carcinoma, NOS	3	3	0	0	0	1
2	1	2	8041/3: Small cell carcinoma, NOS	2	3	0	1	0	1
2	1	2	8041/3: Small cell carcinoma, NOS	4	3	1	1	1	1
2	1	1	8041/3: Small cell carcinoma, NOS	1	3	0	0	0	0
2	1	1	8041/3: Small cell carcinoma, NOS	3	3	0	0	1	0
2	1	2	8041/3: Small cell carcinoma, NOS	3	3	0	0	1	0
1	1	1	8041/3: Small cell carcinoma, NOS	3	3	0	0	1	0
1	1	2	8041/3: Small cell carcinoma, NOS	4	3	0	0	1	0
1	1	1	8041/3: Small cell carcinoma, NOS	4	3	0	0	0	0
1	1	2	8041/3: Small cell carcinoma, NOS	4	3	0	0	0	0
1	1	1	8041/3: Small cell carcinoma, NOS	3	3	0	0	0	0
1	1	2	8041/3: Small cell carcinoma, NOS	3	3	1	0	0	0
1	1	1	8041/3: Small cell carcinoma, NOS	3	3	0	1	0	0
1	1	1	8041/3: Small cell carcinoma, NOS	3	3	0	1	0	0
1	1	2	8041/3: Small cell carcinoma, NOS	3	3	1	0	1	0
1	1	1	8041/3: Small cell carcinoma, NOS	4	3	0	1	0	1
1	1	1	8041/3: Small cell carcinoma, NOS	3	3	0	0	0	0
1	1	2	8041/3: Small cell carcinoma, NOS	1	3	0	0	0	0
1	1	1	8041/3: Small cell carcinoma, NOS	3	3	1	0	0	0
1	1	2	8041/3: Small cell carcinoma, NOS	4	3	0	1	0	0
1	1	1	8041/3: Small cell carcinoma, NOS	1	3	0	0	1	0
1	1	2	8041/3: Small cell carcinoma, NOS	1	3	0	0	1	0
1	1	2	8041/3: Small cell carcinoma, NOS	3	3	1	0	1	0
1	1	2	8041/3: Small cell carcinoma, NOS	3	3	1	1	1	0
1	1	1	8041/3: Small cell carcinoma, NOS	3	3	1	0	1	1
1	1	2	8041/3: Small cell carcinoma, NOS	4	3	1	0	0	0
1	1	1	8041/3: Small cell carcinoma, NOS	3	3	1	0	0	0
1	1	1	8041/3: Small cell carcinoma, NOS	3	3	1	0	0	0
1	1	2	8041/3: Small cell carcinoma, NOS	4	3	1	1	0	0
1	1	1	8041/3: Small cell carcinoma, NOS	4	3	0	1	1	0
1	1	1	8041/3: Small cell carcinoma, NOS	4	3	1	0	0	1
1	1	2	8041/3: Small cell carcinoma, NOS	2	3	0	0	1	1
2	1	2	8041/3: Small cell carcinoma, NOS	3	3	0	0	0	0
2	1	2	8041/3: Small cell carcinoma, NOS	4	3	0	1	0	0
2	1	1	8041/3: Small cell carcinoma, NOS	3	3	0	0	1	0
2	1	2	8041/3: Small cell carcinoma, NOS	3	3	0	0	1	0
2	1	2	8041/3: Small cell carcinoma, NOS	3	3	0	0	1	0
2	1	2	8041/3: Small cell carcinoma, NOS	4	3	1	0	1	0
2	1	1	8041/3: Small cell carcinoma, NOS	3	3	1	0	1	0
2	1	1	8041/3: Small cell carcinoma, NOS	1	3	1	0	1	0
2	1	2	8041/3: Small cell carcinoma, NOS	4	3	0	1	1	0
2	1	1	8041/3: Small cell carcinoma, NOS	2	3	1	1	1	0
2	1	1	8041/3: Small cell carcinoma, NOS	4	3	0	0	0	1
2	1	2	8041/3: Small cell carcinoma, NOS	4	3	0	0	0	1
2	1	1	8041/3: Small cell carcinoma, NOS	3	3	0	1	0	1
2	1	1	8041/3: Small cell carcinoma, NOS	3	3	0	1	1	1
2	1	1	8041/3: Small cell carcinoma, NOS	3	3	1	0	0	0
2	1	2	8041/3: Small cell carcinoma, NOS	3	3	1	0	0	0
2	1	1	8041/3: Small cell carcinoma, NOS	3	3	0	1	0	0
2	1	1	8041/3: Small cell carcinoma, NOS	4	3	0	0	1	0
2	1	1	8041/3: Small cell carcinoma, NOS	4	3	1	0	1	0
2	1	2	8041/3: Small cell carcinoma, NOS	4	3	0	0	0	1
2	1	2	8041/3: Small cell carcinoma, NOS	3	3	1	0	0	1
2	1	2	8041/3: Small cell carcinoma, NOS	1	3	0	0	1	1
2	1	2	8041/3: Small cell carcinoma, NOS	1	3	1	0	1	1
2	1	1	8041/3: Small cell carcinoma, NOS	4	3	0	0	0	0
2	1	2	8041/3: Small cell carcinoma, NOS	3	3	1	0	0	0
2	1	1	8041/3: Small cell carcinoma, NOS	3	3	1	0	0	0
2	1	1	8041/3: Small cell carcinoma, NOS	1	3	0	1	0	0
2	1	2	8041/3: Small cell carcinoma, NOS	1	3	0	1	0	0
2	1	2	8041/3: Small cell carcinoma, NOS	4	3	0	0	1	0
2	1	1	8041/3: Small cell carcinoma, NOS	3	3	0	0	1	0
2	1	1	8041/3: Small cell carcinoma, NOS	4	3	1	0	1	0
2	1	2	8041/3: Small cell carcinoma, NOS	3	3	0	0	0	1
2	1	1	8041/3: Small cell carcinoma, NOS	3	3	0	0	0	0
2	1	2	8041/3: Small cell carcinoma, NOS	3	3	0	0	0	0
2	1	1	8041/3: Small cell carcinoma, NOS	3	3	0	0	0	1
2	1	2	8041/3: Small cell carcinoma, NOS	4	3	0	0	1	1
2	1	2	8041/3: Small cell carcinoma, NOS	3	3	0	0	0	0
2	1	2	8041/3: Small cell carcinoma, NOS	4	3	1	0	0	0
2	1	1	8041/3: Small cell carcinoma, NOS	4	3	0	0	0	1
2	1	2	8041/3: Small cell carcinoma, NOS	3	3	1	0	0	1
1	1	2	8041/3: Small cell carcinoma, NOS	3	3	0	0	1	0
1	1	2	8041/3: Small cell carcinoma, NOS	3	3	1	1	1	1
1	1	2	8041/3: Small cell carcinoma, NOS	3	3	0	0	0	0
1	1	2	8041/3: Small cell carcinoma, NOS	4	3	1	0	0	0
1	1	1	8041/3: Small cell carcinoma, NOS	4	3	1	0	0	0
1	1	2	8041/3: Small cell carcinoma, NOS	4	3	1	0	0	0
1	1	2	8041/3: Small cell carcinoma, NOS	3	3	1	0	0	0
1	1	2	8041/3: Small cell carcinoma, NOS	3	3	1	0	0	0
1	1	2	8041/3: Small cell carcinoma, NOS	3	3	0	1	0	0
1	1	1	8041/3: Small cell carcinoma, NOS	4	3	1	1	0	0
1	1	2	8041/3: Small cell carcinoma, NOS	4	3	0	0	1	0
1	1	1	8041/3: Small cell carcinoma, NOS	4	3	0	0	0	1
1	1	1	8041/3: Small cell carcinoma, NOS	3	3	0	0	0	1
1	1	1	8041/3: Small cell carcinoma, NOS	3	3	1	1	1	1
1	1	1	8041/3: Small cell carcinoma, NOS	3	3	0	0	0	0
1	1	2	8041/3: Small cell carcinoma, NOS	3	3	0	0	0	0
1	1	2	8041/3: Small cell carcinoma, NOS	3	3	0	1	0	0
1	1	2	8041/3: Small cell carcinoma, NOS	3	3	0	0	1	0
1	1	2	8041/3: Small cell carcinoma, NOS	3	3	0	0	1	0
1	1	2	8041/3: Small cell carcinoma, NOS	4	3	1	0	1	0
1	1	1	8041/3: Small cell carcinoma, NOS	3	3	1	0	0	1
1	1	1	8041/3: Small cell carcinoma, NOS	4	3	0	0	1	1
1	1	2	8041/3: Small cell carcinoma, NOS	3	3	1	0	1	1
1	1	2	8041/3: Small cell carcinoma, NOS	4	3	1	1	1	1
2	1	2	8041/3: Small cell carcinoma, NOS	3	3	0	0	0	0
2	1	1	8041/3: Small cell carcinoma, NOS	3	3	0	0	0	0
2	1	2	8041/3: Small cell carcinoma, NOS	3	3	0	0	0	0
2	1	1	8041/3: Small cell carcinoma, NOS	3	3	1	0	0	0
2	1	2	8041/3: Small cell carcinoma, NOS	3	3	0	1	0	0
2	1	2	8041/3: Small cell carcinoma, NOS	1	3	0	1	0	0
2	1	1	8041/3: Small cell carcinoma, NOS	3	3	0	0	1	0
2	1	2	8041/3: Small cell carcinoma, NOS	3	3	0	0	1	0
2	1	2	8041/3: Small cell carcinoma, NOS	4	3	1	0	1	0
2	1	1	8041/3: Small cell carcinoma, NOS	3	3	1	0	1	0
2	1	2	8041/3: Small cell carcinoma, NOS	3	3	0	1	1	0
2	1	2	8041/3: Small cell carcinoma, NOS	4	3	1	1	1	0
2	1	2	8041/3: Small cell carcinoma, NOS	3	3	1	1	1	0
2	1	1	8041/3: Small cell carcinoma, NOS	3	3	0	0	0	1
2	1	2	8041/3: Small cell carcinoma, NOS	4	3	1	0	1	1
2	1	1	8041/3: Small cell carcinoma, NOS	4	3	0	0	0	0
2	1	2	8041/3: Small cell carcinoma, NOS	3	3	0	0	0	0
2	1	1	8041/3: Small cell carcinoma, NOS	4	3	1	0	0	0
2	1	2	8041/3: Small cell carcinoma, NOS	4	3	1	0	0	0
2	1	1	8041/3: Small cell carcinoma, NOS	3	3	1	0	0	0
2	1	1	8041/3: Small cell carcinoma, NOS	3	3	0	1	0	0
2	1	2	8041/3: Small cell carcinoma, NOS	3	3	0	1	1	0
2	1	2	8041/3: Small cell carcinoma, NOS	3	3	0	0	0	1
2	1	1	8041/3: Small cell carcinoma, NOS	4	3	0	0	1	1
2	1	1	8041/3: Small cell carcinoma, NOS	3	3	0	1	1	1
2	1	1	8041/3: Small cell carcinoma, NOS	1	3	0	0	0	0
2	1	1	8041/3: Small cell carcinoma, NOS	3	3	0	0	1	0
2	1	1	8041/3: Small cell carcinoma, NOS	3	3	0	0	1	0
2	1	2	8041/3: Small cell carcinoma, NOS	3	3	0	0	1	0
2	1	1	8041/3: Small cell carcinoma, NOS	3	3	1	0	1	0
2	1	1	8041/3: Small cell carcinoma, NOS	3	3	0	0	1	1
2	1	2	8041/3: Small cell carcinoma, NOS	4	3	1	1	1	1
2	1	1	8041/3: Small cell carcinoma, NOS	3	3	0	0	0	0
2	1	1	8041/3: Small cell carcinoma, NOS	1	3	1	0	0	0
2	1	1	8041/3: Small cell carcinoma, NOS	3	3	0	1	1	0
2	1	1	8041/3: Small cell carcinoma, NOS	4	3	1	0	1	1
2	1	1	8041/3: Small cell carcinoma, NOS	4	3	1	0	0	0
2	1	2	8041/3: Small cell carcinoma, NOS	3	3	0	0	1	0
2	1	1	8041/3: Small cell carcinoma, NOS	4	3	0	0	1	1
1	1	1	8041/3: Small cell carcinoma, NOS	3	3	0	0	1	0
1	1	1	8041/3: Small cell carcinoma, NOS	3	3	1	1	0	1
1	1	1	8041/3: Small cell carcinoma, NOS	3	3	0	0	0	0
1	1	2	8041/3: Small cell carcinoma, NOS	3	3	0	0	0	0
1	1	2	8041/3: Small cell carcinoma, NOS	3	3	0	0	1	0
1	1	2	8041/3: Small cell carcinoma, NOS	3	3	1	1	1	0
1	1	1	8041/3: Small cell carcinoma, NOS	1	3	0	0	0	0
1	1	1	8041/3: Small cell carcinoma, NOS	1	3	0	0	0	0
1	1	2	8041/3: Small cell carcinoma, NOS	4	3	1	0	0	0
1	1	2	8041/3: Small cell carcinoma, NOS	3	3	1	0	0	0
1	1	2	8041/3: Small cell carcinoma, NOS	1	3	0	1	0	0
1	1	1	8041/3: Small cell carcinoma, NOS	3	3	0	0	1	0
1	1	2	8041/3: Small cell carcinoma, NOS	4	3	1	0	1	0
1	1	1	8041/3: Small cell carcinoma, NOS	4	3	0	0	0	1
1	1	1	8041/3: Small cell carcinoma, NOS	4	3	1	0	0	1
1	1	2	8041/3: Small cell carcinoma, NOS	3	3	1	0	1	1
1	1	1	8041/3: Small cell carcinoma, NOS	4	3	1	0	0	0
1	1	1	8041/3: Small cell carcinoma, NOS	3	3	0	1	0	0
1	1	2	8041/3: Small cell carcinoma, NOS	4	3	0	0	1	0
1	1	1	8041/3: Small cell carcinoma, NOS	4	3	0	0	1	0
1	1	1	8041/3: Small cell carcinoma, NOS	3	3	0	0	1	0
1	1	1	8041/3: Small cell carcinoma, NOS	3	3	0	0	1	0
1	1	1	8041/3: Small cell carcinoma, NOS	1	3	0	0	1	0
1	1	1	8041/3: Small cell carcinoma, NOS	1	3	0	0	1	0
1	1	2	8041/3: Small cell carcinoma, NOS	3	3	1	0	1	0
1	1	2	8041/3: Small cell carcinoma, NOS	3	3	0	0	0	1
1	1	2	8041/3: Small cell carcinoma, NOS	3	3	1	0	1	1
2	1	1	8041/3: Small cell carcinoma, NOS	1	3	0	0	0	0
2	1	2	8041/3: Small cell carcinoma, NOS	4	3	0	1	0	0
2	1	1	8041/3: Small cell carcinoma, NOS	3	3	0	0	1	0
2	1	1	8041/3: Small cell carcinoma, NOS	3	3	0	0	1	0
2	1	2	8041/3: Small cell carcinoma, NOS	3	3	0	0	1	0
2	1	1	8041/3: Small cell carcinoma, NOS	4	3	1	1	1	0
2	1	1	8041/3: Small cell carcinoma, NOS	3	3	0	0	0	1
2	1	1	8041/3: Small cell carcinoma, NOS	3	3	0	0	0	0
2	1	2	8041/3: Small cell carcinoma, NOS	4	3	1	0	0	0
2	1	2	8041/3: Small cell carcinoma, NOS	3	3	1	0	0	0
2	1	2	8041/3: Small cell carcinoma, NOS	4	3	0	1	0	0
2	1	1	8041/3: Small cell carcinoma, NOS	4	3	0	0	1	0
2	1	1	8041/3: Small cell carcinoma, NOS	3	3	1	0	1	0
2	1	1	8041/3: Small cell carcinoma, NOS	3	3	0	0	0	1
2	1	2	8041/3: Small cell carcinoma, NOS	4	3	0	1	0	1
2	1	1	8041/3: Small cell carcinoma, NOS	3	3	0	0	0	0
2	1	1	8041/3: Small cell carcinoma, NOS	3	3	1	0	0	0
2	1	2	8041/3: Small cell carcinoma, NOS	1	3	0	0	0	1
2	1	2	8041/3: Small cell carcinoma, NOS	3	3	0	0	0	0
2	1	1	8041/3: Small cell carcinoma, NOS	3	3	0	0	0	0
2	1	1	8041/3: Small cell carcinoma, NOS	3	3	0	0	0	0
2	1	2	8041/3: Small cell carcinoma, NOS	3	3	0	1	0	0
2	1	1	8041/3: Small cell carcinoma, NOS	3	3	1	1	1	0
2	1	2	8041/3: Small cell carcinoma, NOS	3	3	0	0	0	1
1	1	1	8041/3: Small cell carcinoma, NOS	1	3	0	0	0	0
1	1	1	8041/3: Small cell carcinoma, NOS	4	3	0	1	0	0
1	1	2	8041/3: Small cell carcinoma, NOS	4	3	0	0	1	0
1	1	2	8041/3: Small cell carcinoma, NOS	3	3	0	0	0	1
1	1	2	8041/3: Small cell carcinoma, NOS	4	3	0	1	0	0
1	1	2	8041/3: Small cell carcinoma, NOS	3	3	1	1	1	0
1	1	2	8041/3: Small cell carcinoma, NOS	3	3	1	0	0	0
1	1	1	8041/3: Small cell carcinoma, NOS	4	3	0	0	1	0
1	1	2	8041/3: Small cell carcinoma, NOS	3	3	0	0	1	0
1	1	2	8041/3: Small cell carcinoma, NOS	3	3	0	0	1	0
1	1	2	8041/3: Small cell carcinoma, NOS	4	3	1	0	1	0
1	1	2	8041/3: Small cell carcinoma, NOS	1	3	1	0	1	0
1	1	2	8041/3: Small cell carcinoma, NOS	4	3	0	1	1	1
1	1	2	8041/3: Small cell carcinoma, NOS	3	3	0	1	0	0
1	1	2	8041/3: Small cell carcinoma, NOS	3	3	0	0	1	0
1	1	1	8041/3: Small cell carcinoma, NOS	3	3	1	0	1	0
1	1	2	8041/3: Small cell carcinoma, NOS	3	3	1	1	1	0
2	1	2	8041/3: Small cell carcinoma, NOS	4	3	0	0	0	0
2	1	2	8041/3: Small cell carcinoma, NOS	3	3	0	0	0	0
2	1	1	8041/3: Small cell carcinoma, NOS	1	3	0	0	0	0
2	1	1	8041/3: Small cell carcinoma, NOS	1	3	0	0	0	0
2	1	1	8041/3: Small cell carcinoma, NOS	3	3	0	1	0	0
2	1	2	8041/3: Small cell carcinoma, NOS	3	3	0	1	0	0
2	1	2	8041/3: Small cell carcinoma, NOS	3	3	0	0	1	0
2	1	2	8041/3: Small cell carcinoma, NOS	4	3	1	0	1	0
2	1	1	8041/3: Small cell carcinoma, NOS	4	3	0	1	1	0
2	1	2	8041/3: Small cell carcinoma, NOS	3	3	0	0	0	0
2	1	2	8041/3: Small cell carcinoma, NOS	2	3	0	0	0	0
2	1	2	8041/3: Small cell carcinoma, NOS	3	3	0	1	0	0
2	1	1	8041/3: Small cell carcinoma, NOS	3	3	0	0	0	1
2	1	2	8041/3: Small cell carcinoma, NOS	4	3	1	1	0	1
2	1	2	8041/3: Small cell carcinoma, NOS	3	3	0	0	1	1
2	1	2	8041/3: Small cell carcinoma, NOS	1	3	0	0	0	0
2	1	2	8041/3: Small cell carcinoma, NOS	4	3	0	0	0	1
2	1	1	8041/3: Small cell carcinoma, NOS	4	3	0	0	1	1
2	1	1	8041/3: Small cell carcinoma, NOS	3	3	0	0	0	0
2	1	1	8041/3: Small cell carcinoma, NOS	4	3	0	0	1	0
1	1	1	8041/3: Small cell carcinoma, NOS	3	3	0	1	0	0
1	1	2	8041/3: Small cell carcinoma, NOS	3	3	0	1	1	0
1	1	1	8041/3: Small cell carcinoma, NOS	3	3	1	0	1	1
1	1	1	8041/3: Small cell carcinoma, NOS	4	3	0	0	0	0
1	1	1	8041/3: Small cell carcinoma, NOS	3	3	0	0	0	0
1	1	1	8041/3: Small cell carcinoma, NOS	2	3	0	0	0	0
1	1	1	8041/3: Small cell carcinoma, NOS	3	3	0	0	1	0
1	1	1	8041/3: Small cell carcinoma, NOS	4	3	1	0	1	0
1	1	1	8041/3: Small cell carcinoma, NOS	4	3	1	1	1	0
1	1	1	8041/3: Small cell carcinoma, NOS	4	3	0	0	0	0
1	1	1	8041/3: Small cell carcinoma, NOS	3	3	0	0	0	0
1	1	2	8041/3: Small cell carcinoma, NOS	3	3	0	0	0	0
1	1	1	8041/3: Small cell carcinoma, NOS	3	3	0	0	0	0
1	1	1	8041/3: Small cell carcinoma, NOS	2	3	0	0	0	0
1	1	1	8041/3: Small cell carcinoma, NOS	4	3	1	0	0	0
1	1	1	8041/3: Small cell carcinoma, NOS	4	3	1	0	0	0
1	1	2	8041/3: Small cell carcinoma, NOS	1	3	1	0	0	0
1	1	1	8041/3: Small cell carcinoma, NOS	3	3	0	1	0	0
1	1	1	8041/3: Small cell carcinoma, NOS	3	3	0	1	0	0
1	1	2	8041/3: Small cell carcinoma, NOS	3	3	1	1	0	0
1	1	1	8041/3: Small cell carcinoma, NOS	3	3	0	0	1	0
1	1	2	8041/3: Small cell carcinoma, NOS	4	3	1	0	1	0
1	1	2	8041/3: Small cell carcinoma, NOS	3	3	1	0	1	0
1	1	2	8041/3: Small cell carcinoma, NOS	2	3	1	0	1	0
1	1	2	8041/3: Small cell carcinoma, NOS	1	3	1	0	1	0
1	1	1	8041/3: Small cell carcinoma, NOS	2	3	0	1	1	0
1	1	2	8041/3: Small cell carcinoma, NOS	4	3	1	1	1	0
1	1	1	8041/3: Small cell carcinoma, NOS	4	3	0	0	0	1
1	1	1	8041/3: Small cell carcinoma, NOS	4	3	0	0	0	1
1	1	2	8041/3: Small cell carcinoma, NOS	3	3	0	0	0	1
1	1	2	8041/3: Small cell carcinoma, NOS	3	3	0	0	0	1
1	1	2	8041/3: Small cell carcinoma, NOS	3	3	1	0	0	1
1	1	2	8041/3: Small cell carcinoma, NOS	4	3	0	1	0	1
1	1	2	8041/3: Small cell carcinoma, NOS	4	3	0	0	1	1
1	1	1	8041/3: Small cell carcinoma, NOS	3	3	1	0	1	1
1	1	2	8041/3: Small cell carcinoma, NOS	3	3	1	1	1	1
1	1	1	8041/3: Small cell carcinoma, NOS	4	3	0	0	0	0
1	1	1	8041/3: Small cell carcinoma, NOS	3	3	0	0	0	0
1	1	2	8041/3: Small cell carcinoma, NOS	3	3	0	0	0	0
1	1	1	8041/3: Small cell carcinoma, NOS	4	3	1	0	0	0
1	1	1	8041/3: Small cell carcinoma, NOS	4	3	1	0	0	0
1	1	1	8041/3: Small cell carcinoma, NOS	4	3	0	0	1	0
1	1	1	8041/3: Small cell carcinoma, NOS	3	3	0	0	1	0
1	1	1	8041/3: Small cell carcinoma, NOS	1	3	0	0	1	0
1	1	2	8041/3: Small cell carcinoma, NOS	3	3	1	0	1	0
1	1	2	8041/3: Small cell carcinoma, NOS	3	3	1	0	1	0
1	1	2	8041/3: Small cell carcinoma, NOS	3	3	1	0	1	0
1	1	2	8041/3: Small cell carcinoma, NOS	4	3	0	1	1	0
1	1	2	8041/3: Small cell carcinoma, NOS	3	3	1	1	1	0
1	1	1	8041/3: Small cell carcinoma, NOS	4	3	0	0	0	1
1	1	1	8041/3: Small cell carcinoma, NOS	3	3	0	0	0	1
1	1	1	8041/3: Small cell carcinoma, NOS	3	3	0	0	0	1
1	1	2	8041/3: Small cell carcinoma, NOS	3	3	0	0	0	1
1	1	1	8041/3: Small cell carcinoma, NOS	3	3	0	0	0	1
1	1	1	8041/3: Small cell carcinoma, NOS	4	3	0	1	0	1
1	1	1	8041/3: Small cell carcinoma, NOS	3	3	0	1	0	1
1	1	2	8041/3: Small cell carcinoma, NOS	4	3	0	0	1	1
1	1	2	8041/3: Small cell carcinoma, NOS	3	3	1	0	1	1
1	1	1	8041/3: Small cell carcinoma, NOS	3	3	1	1	1	1
1	1	1	8041/3: Small cell carcinoma, NOS	3	3	0	0	0	0
1	1	2	8041/3: Small cell carcinoma, NOS	3	3	0	0	0	0
1	1	2	8041/3: Small cell carcinoma, NOS	3	3	0	0	0	0
1	1	1	8041/3: Small cell carcinoma, NOS	3	3	0	0	0	0
1	1	2	8041/3: Small cell carcinoma, NOS	3	3	0	0	0	0
1	1	2	8041/3: Small cell carcinoma, NOS	3	3	0	0	0	0
1	1	2	8041/3: Small cell carcinoma, NOS	3	3	0	0	0	0
1	1	1	8041/3: Small cell carcinoma, NOS	3	3	0	0	0	0
1	1	2	8041/3: Small cell carcinoma, NOS	3	3	0	0	0	0
1	1	2	8041/3: Small cell carcinoma, NOS	3	3	0	0	0	0
1	1	1	8041/3: Small cell carcinoma, NOS	2	3	0	0	0	0
1	1	1	8041/3: Small cell carcinoma, NOS	2	3	0	0	0	0
1	1	1	8041/3: Small cell carcinoma, NOS	2	3	0	0	0	0
1	1	2	8041/3: Small cell carcinoma, NOS	3	3	1	0	0	0
1	1	2	8041/3: Small cell carcinoma, NOS	3	3	1	0	0	0
1	1	1	8041/3: Small cell carcinoma, NOS	3	3	0	1	0	0
1	1	1	8041/3: Small cell carcinoma, NOS	3	3	0	1	0	0
1	1	1	8041/3: Small cell carcinoma, NOS	3	3	0	1	0	0
1	1	2	8041/3: Small cell carcinoma, NOS	1	3	0	1	0	0
1	1	1	8041/3: Small cell carcinoma, NOS	1	3	1	1	0	0
1	1	1	8041/3: Small cell carcinoma, NOS	4	3	0	0	1	0
1	1	1	8041/3: Small cell carcinoma, NOS	4	3	0	0	1	0
1	1	2	8041/3: Small cell carcinoma, NOS	3	3	0	0	1	0
1	1	1	8041/3: Small cell carcinoma, NOS	3	3	0	0	1	0
1	1	1	8041/3: Small cell carcinoma, NOS	3	3	0	0	1	0
1	1	2	8041/3: Small cell carcinoma, NOS	1	3	0	0	1	0
1	1	2	8041/3: Small cell carcinoma, NOS	4	3	1	0	1	0
1	1	1	8041/3: Small cell carcinoma, NOS	4	3	1	0	1	0
1	1	2	8041/3: Small cell carcinoma, NOS	3	3	1	0	1	0
1	1	2	8041/3: Small cell carcinoma, NOS	3	3	1	0	1	0
1	1	2	8041/3: Small cell carcinoma, NOS	3	3	1	0	1	0
1	1	2	8041/3: Small cell carcinoma, NOS	3	3	1	0	1	0
1	1	2	8041/3: Small cell carcinoma, NOS	3	3	1	0	1	0
1	1	1	8041/3: Small cell carcinoma, NOS	3	3	1	0	1	0
1	1	2	8041/3: Small cell carcinoma, NOS	2	3	1	0	1	0
1	1	2	8041/3: Small cell carcinoma, NOS	4	3	1	1	1	0
1	1	2	8041/3: Small cell carcinoma, NOS	4	3	0	0	0	1
1	1	1	8041/3: Small cell carcinoma, NOS	3	3	0	0	0	1
1	1	2	8041/3: Small cell carcinoma, NOS	3	3	1	0	0	1
1	1	2	8041/3: Small cell carcinoma, NOS	3	3	1	0	0	1
1	1	2	8041/3: Small cell carcinoma, NOS	4	3	0	1	0	1
1	1	1	8041/3: Small cell carcinoma, NOS	3	3	1	1	0	1
1	1	2	8041/3: Small cell carcinoma, NOS	4	3	0	0	1	1
1	1	2	8041/3: Small cell carcinoma, NOS	4	3	0	0	1	1
1	1	1	8041/3: Small cell carcinoma, NOS	3	3	0	0	1	1
1	1	2	8041/3: Small cell carcinoma, NOS	3	3	0	0	1	1
1	1	2	8041/3: Small cell carcinoma, NOS	3	3	1	0	1	1
1	1	1	8041/3: Small cell carcinoma, NOS	3	3	1	0	1	1
1	1	2	8041/3: Small cell carcinoma, NOS	4	3	0	1	1	1
1	1	2	8041/3: Small cell carcinoma, NOS	4	3	1	1	1	1
1	1	2	8041/3: Small cell carcinoma, NOS	3	3	1	1	1	1
2	1	1	8041/3: Small cell carcinoma, NOS	4	3	0	0	0	0
2	1	1	8041/3: Small cell carcinoma, NOS	3	3	0	0	0	0
2	1	1	8041/3: Small cell carcinoma, NOS	3	3	0	0	0	0
2	1	2	8041/3: Small cell carcinoma, NOS	2	3	0	0	0	0
2	1	2	8041/3: Small cell carcinoma, NOS	4	3	1	0	0	0
2	1	1	8041/3: Small cell carcinoma, NOS	4	3	1	0	0	0
2	1	2	8041/3: Small cell carcinoma, NOS	1	3	1	0	0	0
2	1	1	8041/3: Small cell carcinoma, NOS	4	3	0	1	0	0
2	1	1	8041/3: Small cell carcinoma, NOS	4	3	0	1	0	0
2	1	2	8041/3: Small cell carcinoma, NOS	4	3	0	1	0	0
2	1	2	8041/3: Small cell carcinoma, NOS	4	3	0	1	0	0
2	1	1	8041/3: Small cell carcinoma, NOS	3	3	0	1	0	0
2	1	1	8041/3: Small cell carcinoma, NOS	3	3	0	1	0	0
2	1	2	8041/3: Small cell carcinoma, NOS	1	3	0	1	0	0
2	1	1	8041/3: Small cell carcinoma, NOS	4	3	0	0	1	0
2	1	2	8041/3: Small cell carcinoma, NOS	4	3	0	0	1	0
2	1	2	8041/3: Small cell carcinoma, NOS	3	3	0	0	1	0
2	1	1	8041/3: Small cell carcinoma, NOS	3	3	0	0	1	0
2	1	2	8041/3: Small cell carcinoma, NOS	3	3	0	0	1	0
2	1	2	8041/3: Small cell carcinoma, NOS	4	3	1	0	1	0
2	1	2	8041/3: Small cell carcinoma, NOS	3	3	1	0	1	0
2	1	2	8041/3: Small cell carcinoma, NOS	3	3	1	0	1	0
2	1	2	8041/3: Small cell carcinoma, NOS	3	3	1	0	1	0
2	1	2	8041/3: Small cell carcinoma, NOS	2	3	1	0	1	0
2	1	2	8041/3: Small cell carcinoma, NOS	3	3	0	1	1	0
2	1	2	8041/3: Small cell carcinoma, NOS	3	3	1	1	1	0
2	1	1	8041/3: Small cell carcinoma, NOS	4	3	0	0	0	1
2	1	1	8041/3: Small cell carcinoma, NOS	3	3	0	0	0	1
2	1	1	8041/3: Small cell carcinoma, NOS	3	3	1	0	0	1
2	1	2	8041/3: Small cell carcinoma, NOS	1	3	1	0	0	1
2	1	2	8041/3: Small cell carcinoma, NOS	3	3	1	0	1	1
2	1	2	8041/3: Small cell carcinoma, NOS	3	3	1	1	1	1
2	1	1	8041/3: Small cell carcinoma, NOS	3	3	0	0	0	0
2	1	2	8041/3: Small cell carcinoma, NOS	3	3	0	0	0	0
2	1	1	8041/3: Small cell carcinoma, NOS	3	3	0	0	0	0
2	1	2	8041/3: Small cell carcinoma, NOS	4	3	1	0	0	0
2	1	2	8041/3: Small cell carcinoma, NOS	4	3	1	0	0	0
2	1	1	8041/3: Small cell carcinoma, NOS	3	3	1	0	0	0
2	1	1	8041/3: Small cell carcinoma, NOS	3	3	1	0	0	0
2	1	1	8041/3: Small cell carcinoma, NOS	3	3	1	0	0	0
2	1	2	8041/3: Small cell carcinoma, NOS	3	3	1	0	0	0
2	1	2	8041/3: Small cell carcinoma, NOS	3	3	1	0	0	0
2	1	1	8041/3: Small cell carcinoma, NOS	1	3	1	0	0	0
2	1	2	8041/3: Small cell carcinoma, NOS	3	3	0	1	0	0
2	1	2	8041/3: Small cell carcinoma, NOS	3	3	0	1	0	0
2	1	2	8041/3: Small cell carcinoma, NOS	2	3	0	1	0	0
2	1	1	8041/3: Small cell carcinoma, NOS	1	3	0	1	0	0
2	1	2	8041/3: Small cell carcinoma, NOS	4	3	1	1	0	0
2	1	2	8041/3: Small cell carcinoma, NOS	3	3	0	0	1	0
2	1	2	8041/3: Small cell carcinoma, NOS	3	3	0	0	1	0
2	1	1	8041/3: Small cell carcinoma, NOS	3	3	0	0	1	0
2	1	1	8041/3: Small cell carcinoma, NOS	3	3	0	0	1	0
2	1	1	8041/3: Small cell carcinoma, NOS	2	3	0	0	1	0
2	1	1	8041/3: Small cell carcinoma, NOS	3	3	1	0	1	0
2	1	2	8041/3: Small cell carcinoma, NOS	3	3	1	0	1	0
2	1	2	8041/3: Small cell carcinoma, NOS	3	3	1	0	1	0
2	1	2	8041/3: Small cell carcinoma, NOS	3	3	0	1	1	0
2	1	2	8041/3: Small cell carcinoma, NOS	3	3	0	0	0	1
2	1	2	8041/3: Small cell carcinoma, NOS	3	3	0	0	0	1
2	1	2	8041/3: Small cell carcinoma, NOS	2	3	0	0	0	1
2	1	1	8041/3: Small cell carcinoma, NOS	2	3	0	0	0	1
2	1	1	8041/3: Small cell carcinoma, NOS	4	3	1	1	0	1
2	1	2	8041/3: Small cell carcinoma, NOS	3	3	0	0	1	1
2	1	1	8041/3: Small cell carcinoma, NOS	3	3	0	0	1	1
2	1	1	8041/3: Small cell carcinoma, NOS	1	3	0	0	1	1
2	1	2	8041/3: Small cell carcinoma, NOS	3	3	0	0	0	0
2	1	1	8041/3: Small cell carcinoma, NOS	3	3	0	0	0	0
2	1	1	8041/3: Small cell carcinoma, NOS	3	3	0	0	0	0
2	1	2	8041/3: Small cell carcinoma, NOS	3	3	0	0	0	0
2	1	1	8041/3: Small cell carcinoma, NOS	3	3	0	0	0	0
2	1	1	8041/3: Small cell carcinoma, NOS	4	3	1	0	0	0
2	1	1	8041/3: Small cell carcinoma, NOS	3	3	1	0	0	0
2	1	2	8041/3: Small cell carcinoma, NOS	1	3	1	0	0	0
2	1	2	8041/3: Small cell carcinoma, NOS	4	3	0	1	0	0
2	1	2	8041/3: Small cell carcinoma, NOS	4	3	0	1	0	0
2	1	2	8041/3: Small cell carcinoma, NOS	3	3	0	1	0	0
2	1	1	8041/3: Small cell carcinoma, NOS	1	3	1	1	0	0
2	1	1	8041/3: Small cell carcinoma, NOS	4	3	0	0	1	0
2	1	2	8041/3: Small cell carcinoma, NOS	4	3	0	0	1	0
2	1	1	8041/3: Small cell carcinoma, NOS	4	3	0	0	1	0
2	1	2	8041/3: Small cell carcinoma, NOS	3	3	0	0	1	0
2	1	2	8041/3: Small cell carcinoma, NOS	3	3	0	0	1	0
2	1	2	8041/3: Small cell carcinoma, NOS	2	3	0	0	1	0
2	1	1	8041/3: Small cell carcinoma, NOS	1	3	0	0	1	0
2	1	2	8041/3: Small cell carcinoma, NOS	4	3	1	0	1	0
2	1	2	8041/3: Small cell carcinoma, NOS	3	3	1	0	1	0
2	1	1	8041/3: Small cell carcinoma, NOS	3	3	1	0	1	0
2	1	2	8041/3: Small cell carcinoma, NOS	4	3	0	0	0	1
2	1	2	8041/3: Small cell carcinoma, NOS	3	3	0	0	0	1
2	1	2	8041/3: Small cell carcinoma, NOS	3	3	0	0	0	1
2	1	1	8041/3: Small cell carcinoma, NOS	3	3	0	0	0	1
2	1	2	8041/3: Small cell carcinoma, NOS	1	3	0	0	0	1
2	1	1	8041/3: Small cell carcinoma, NOS	4	3	1	1	1	1
2	1	2	8041/3: Small cell carcinoma, NOS	3	3	0	0	0	0
2	1	2	8041/3: Small cell carcinoma, NOS	1	3	0	0	0	0
2	1	2	8041/3: Small cell carcinoma, NOS	2	3	1	0	0	0
2	1	2	8041/3: Small cell carcinoma, NOS	1	3	1	0	0	0
2	1	2	8041/3: Small cell carcinoma, NOS	4	3	0	1	0	0
2	1	1	8041/3: Small cell carcinoma, NOS	3	3	0	0	1	0
2	1	2	8041/3: Small cell carcinoma, NOS	4	3	1	0	1	0
2	1	2	8041/3: Small cell carcinoma, NOS	3	3	0	0	1	1
2	1	2	8041/3: Small cell carcinoma, NOS	1	3	0	0	1	1
2	1	2	8041/3: Small cell carcinoma, NOS	3	3	1	0	1	1
2	1	1	8041/3: Small cell carcinoma, NOS	3	3	0	0	0	0
2	1	1	8041/3: Small cell carcinoma, NOS	3	3	0	0	0	0
2	1	2	8041/3: Small cell carcinoma, NOS	3	3	0	0	0	0
2	1	1	8041/3: Small cell carcinoma, NOS	4	3	0	0	0	1
2	1	1	8041/3: Small cell carcinoma, NOS	3	3	0	0	0	1
2	1	2	8041/3: Small cell carcinoma, NOS	1	3	0	0	0	1
1	1	2	8041/3: Small cell carcinoma, NOS	3	3	0	1	0	0
1	1	2	8041/3: Small cell carcinoma, NOS	1	3	0	1	0	0
1	1	2	8041/3: Small cell carcinoma, NOS	4	3	1	0	1	0
1	1	2	8041/3: Small cell carcinoma, NOS	3	3	1	1	1	1
1	1	2	8041/3: Small cell carcinoma, NOS	4	3	0	0	0	0
1	1	1	8041/3: Small cell carcinoma, NOS	3	3	0	0	0	0
1	1	1	8041/3: Small cell carcinoma, NOS	2	3	0	0	0	0
1	1	2	8041/3: Small cell carcinoma, NOS	1	3	1	0	0	0
1	1	1	8041/3: Small cell carcinoma, NOS	3	3	0	1	0	0
1	1	2	8041/3: Small cell carcinoma, NOS	3	3	0	1	0	0
1	1	2	8041/3: Small cell carcinoma, NOS	3	3	1	0	1	0
1	1	1	8041/3: Small cell carcinoma, NOS	1	3	1	0	0	1
1	1	2	8041/3: Small cell carcinoma, NOS	4	3	0	0	1	1
1	1	1	8041/3: Small cell carcinoma, NOS	3	3	1	0	1	1
2	1	2	8041/3: Small cell carcinoma, NOS	3	3	1	0	0	0
2	1	2	8041/3: Small cell carcinoma, NOS	3	3	0	1	0	0
2	1	1	8041/3: Small cell carcinoma, NOS	4	3	0	0	1	0
2	1	2	8041/3: Small cell carcinoma, NOS	4	3	0	0	1	0
2	1	2	8041/3: Small cell carcinoma, NOS	3	3	0	0	1	0
2	1	1	8041/3: Small cell carcinoma, NOS	2	3	1	0	1	0
2	1	1	8041/3: Small cell carcinoma, NOS	3	3	0	0	0	0
2	1	2	8041/3: Small cell carcinoma, NOS	4	3	0	0	1	0
2	1	2	8041/3: Small cell carcinoma, NOS	3	3	0	0	1	0
2	1	1	8041/3: Small cell carcinoma, NOS	3	3	1	0	1	0
2	1	2	8041/3: Small cell carcinoma, NOS	4	3	0	1	1	0
2	1	1	8041/3: Small cell carcinoma, NOS	3	3	0	0	1	1
2	1	1	8041/3: Small cell carcinoma, NOS	3	3	0	0	0	0
2	1	1	8041/3: Small cell carcinoma, NOS	2	3	0	0	1	0
2	1	1	8041/3: Small cell carcinoma, NOS	3	3	0	1	0	0
2	1	1	8041/3: Small cell carcinoma, NOS	2	3	1	0	0	0
2	1	2	8041/3: Small cell carcinoma, NOS	3	3	1	0	1	1
1	1	2	8041/3: Small cell carcinoma, NOS	4	3	1	1	0	0
1	1	2	8041/3: Small cell carcinoma, NOS	3	3	0	0	1	0
1	1	1	8041/3: Small cell carcinoma, NOS	3	3	0	0	0	0
1	1	1	8041/3: Small cell carcinoma, NOS	1	3	0	0	0	0
1	1	2	8041/3: Small cell carcinoma, NOS	3	3	0	1	0	0
1	1	1	8041/3: Small cell carcinoma, NOS	1	3	0	1	0	0
1	1	1	8041/3: Small cell carcinoma, NOS	3	3	1	1	0	0
1	1	2	8041/3: Small cell carcinoma, NOS	3	3	0	0	1	0
1	1	1	8041/3: Small cell carcinoma, NOS	4	3	1	0	1	0
1	1	1	8041/3: Small cell carcinoma, NOS	3	3	0	0	0	0
1	1	2	8041/3: Small cell carcinoma, NOS	3	3	1	0	0	0
1	1	2	8041/3: Small cell carcinoma, NOS	4	3	0	1	0	0
1	1	2	8041/3: Small cell carcinoma, NOS	3	3	0	1	0	0
1	1	2	8041/3: Small cell carcinoma, NOS	3	3	0	1	0	0
1	1	2	8041/3: Small cell carcinoma, NOS	3	3	0	1	0	0
1	1	1	8041/3: Small cell carcinoma, NOS	3	3	0	0	1	0
1	1	1	8041/3: Small cell carcinoma, NOS	1	3	1	1	1	0
1	1	1	8041/3: Small cell carcinoma, NOS	3	3	0	1	0	1
1	1	2	8041/3: Small cell carcinoma, NOS	3	3	0	0	1	1
1	1	2	8041/3: Small cell carcinoma, NOS	4	3	0	0	0	0
1	1	1	8041/3: Small cell carcinoma, NOS	3	3	0	0	0	0
1	1	1	8041/3: Small cell carcinoma, NOS	4	3	1	0	0	0
1	1	2	8041/3: Small cell carcinoma, NOS	3	3	1	0	0	0
1	1	1	8041/3: Small cell carcinoma, NOS	3	3	1	1	0	0
1	1	1	8041/3: Small cell carcinoma, NOS	4	3	0	0	1	0
1	1	1	8041/3: Small cell carcinoma, NOS	3	3	0	0	1	0
1	1	2	8041/3: Small cell carcinoma, NOS	2	3	0	0	1	0
1	1	2	8041/3: Small cell carcinoma, NOS	4	3	1	0	1	0
1	1	1	8041/3: Small cell carcinoma, NOS	3	3	1	0	1	0
1	1	2	8041/3: Small cell carcinoma, NOS	4	3	0	0	0	1
2	1	1	8041/3: Small cell carcinoma, NOS	4	3	0	1	0	0
2	1	2	8041/3: Small cell carcinoma, NOS	3	3	0	1	0	0
2	1	2	8041/3: Small cell carcinoma, NOS	1	3	0	1	0	0
2	1	2	8041/3: Small cell carcinoma, NOS	1	3	0	1	0	0
2	1	2	8041/3: Small cell carcinoma, NOS	1	3	1	1	0	0
2	1	1	8041/3: Small cell carcinoma, NOS	4	3	0	0	1	0
2	1	1	8041/3: Small cell carcinoma, NOS	3	3	1	0	1	0
2	1	2	8041/3: Small cell carcinoma, NOS	4	3	1	0	0	1
2	1	2	8041/3: Small cell carcinoma, NOS	3	3	1	0	0	1
2	1	2	8041/3: Small cell carcinoma, NOS	4	3	0	1	0	1
2	1	2	8041/3: Small cell carcinoma, NOS	3	3	0	0	1	1
2	1	1	8041/3: Small cell carcinoma, NOS	3	3	0	0	1	1
2	1	1	8041/3: Small cell carcinoma, NOS	3	3	0	0	0	0
2	1	2	8041/3: Small cell carcinoma, NOS	3	3	1	0	1	0
2	1	1	8041/3: Small cell carcinoma, NOS	3	3	1	0	1	0
2	1	1	8041/3: Small cell carcinoma, NOS	4	3	0	0	1	1
2	1	2	8041/3: Small cell carcinoma, NOS	3	3	0	0	0	0
2	1	1	8041/3: Small cell carcinoma, NOS	4	3	1	0	0	0
1	1	2	8041/3: Small cell carcinoma, NOS	4	3	0	0	0	0
1	1	1	8041/3: Small cell carcinoma, NOS	3	3	0	0	0	1
1	1	2	8041/3: Small cell carcinoma, NOS	4	3	0	0	0	0
1	1	1	8041/3: Small cell carcinoma, NOS	3	3	0	0	0	0
1	1	2	8041/3: Small cell carcinoma, NOS	3	3	1	0	1	0
1	1	2	8041/3: Small cell carcinoma, NOS	3	3	1	1	1	0
1	1	2	8041/3: Small cell carcinoma, NOS	4	3	1	0	0	0
1	1	1	8041/3: Small cell carcinoma, NOS	3	3	0	1	0	0
1	1	2	8041/3: Small cell carcinoma, NOS	3	3	0	0	1	0
1	1	2	8041/3: Small cell carcinoma, NOS	3	3	0	0	1	0
1	1	2	8041/3: Small cell carcinoma, NOS	3	3	0	0	0	1
1	1	1	8041/3: Small cell carcinoma, NOS	3	3	0	0	0	0
1	1	1	8041/3: Small cell carcinoma, NOS	4	3	1	0	0	0
1	1	1	8041/3: Small cell carcinoma, NOS	2	3	1	0	0	0
1	1	1	8041/3: Small cell carcinoma, NOS	3	3	0	1	0	0
1	1	2	8041/3: Small cell carcinoma, NOS	2	3	0	1	0	0
1	1	2	8041/3: Small cell carcinoma, NOS	4	3	1	1	0	0
1	1	1	8041/3: Small cell carcinoma, NOS	4	3	0	0	1	0
1	1	1	8041/3: Small cell carcinoma, NOS	3	3	0	1	1	0
2	1	2	8041/3: Small cell carcinoma, NOS	3	3	0	0	0	0
2	1	2	8041/3: Small cell carcinoma, NOS	3	3	0	0	0	0
2	1	2	8041/3: Small cell carcinoma, NOS	3	3	1	0	0	0
2	1	1	8041/3: Small cell carcinoma, NOS	3	3	1	0	0	0
2	1	2	8041/3: Small cell carcinoma, NOS	3	3	0	1	0	0
2	1	2	8041/3: Small cell carcinoma, NOS	3	3	1	1	0	0
2	1	1	8041/3: Small cell carcinoma, NOS	3	3	0	0	1	0
2	1	2	8041/3: Small cell carcinoma, NOS	3	3	0	0	1	0
2	1	2	8041/3: Small cell carcinoma, NOS	3	3	0	0	1	0
2	1	2	8041/3: Small cell carcinoma, NOS	4	3	1	0	1	0
2	1	2	8041/3: Small cell carcinoma, NOS	3	3	1	1	0	1
2	1	2	8041/3: Small cell carcinoma, NOS	4	3	1	0	1	1
2	1	1	8041/3: Small cell carcinoma, NOS	3	3	1	0	1	1
2	1	2	8041/3: Small cell carcinoma, NOS	4	3	0	0	0	0
2	1	2	8041/3: Small cell carcinoma, NOS	4	3	0	0	0	0
2	1	2	8041/3: Small cell carcinoma, NOS	3	3	1	0	0	0
2	1	1	8041/3: Small cell carcinoma, NOS	3	3	0	1	0	0
2	1	2	8041/3: Small cell carcinoma, NOS	4	3	0	0	1	0
2	1	1	8041/3: Small cell carcinoma, NOS	3	3	0	0	1	0
2	1	1	8041/3: Small cell carcinoma, NOS	3	3	1	0	1	0
2	1	2	8041/3: Small cell carcinoma, NOS	3	3	1	1	1	0
2	1	2	8041/3: Small cell carcinoma, NOS	4	3	0	0	0	1
2	1	2	8041/3: Small cell carcinoma, NOS	3	3	1	0	1	1
2	1	1	8041/3: Small cell carcinoma, NOS	4	3	1	0	1	0
2	1	2	8041/3: Small cell carcinoma, NOS	3	3	1	0	1	0
2	1	2	8041/3: Small cell carcinoma, NOS	3	3	0	0	1	1
2	1	2	8041/3: Small cell carcinoma, NOS	3	3	1	0	1	1
2	1	2	8041/3: Small cell carcinoma, NOS	3	3	0	1	1	1
2	1	2	8041/3: Small cell carcinoma, NOS	4	3	0	0	0	0
2	1	1	8041/3: Small cell carcinoma, NOS	3	3	0	0	0	0
2	1	2	8041/3: Small cell carcinoma, NOS	1	3	0	1	0	0
2	1	1	8041/3: Small cell carcinoma, NOS	4	3	0	0	1	0
2	1	1	8041/3: Small cell carcinoma, NOS	3	3	1	0	1	0
2	1	1	8041/3: Small cell carcinoma, NOS	3	3	1	1	1	0
2	1	2	8041/3: Small cell carcinoma, NOS	4	3	1	0	0	0
2	1	2	8041/3: Small cell carcinoma, NOS	4	3	1	0	0	0
2	1	1	8041/3: Small cell carcinoma, NOS	4	3	0	0	0	1
1	1	1	8041/3: Small cell carcinoma, NOS	3	3	0	1	0	0
1	1	1	8041/3: Small cell carcinoma, NOS	2	3	0	1	0	0
1	1	1	8041/3: Small cell carcinoma, NOS	3	3	1	0	1	0
1	1	2	8041/3: Small cell carcinoma, NOS	1	3	0	1	0	0
1	1	1	8041/3: Small cell carcinoma, NOS	1	3	0	1	0	0
1	1	2	8041/3: Small cell carcinoma, NOS	4	3	1	0	1	0
1	1	1	8041/3: Small cell carcinoma, NOS	3	3	0	0	0	1
1	1	2	8041/3: Small cell carcinoma, NOS	3	3	1	0	0	0
1	1	2	8041/3: Small cell carcinoma, NOS	1	3	0	1	0	0
1	1	2	8041/3: Small cell carcinoma, NOS	3	3	1	0	1	0
1	1	1	8041/3: Small cell carcinoma, NOS	4	3	1	1	1	1
2	1	1	8041/3: Small cell carcinoma, NOS	4	3	0	0	0	0
2	1	2	8041/3: Small cell carcinoma, NOS	3	3	1	0	0	0
2	1	2	8041/3: Small cell carcinoma, NOS	4	3	0	1	0	0
2	1	2	8041/3: Small cell carcinoma, NOS	4	3	0	1	0	0
2	1	2	8041/3: Small cell carcinoma, NOS	1	3	0	1	0	0
2	1	1	8041/3: Small cell carcinoma, NOS	4	3	1	0	1	0
2	1	2	8041/3: Small cell carcinoma, NOS	3	3	1	0	1	0
2	1	1	8041/3: Small cell carcinoma, NOS	4	3	0	1	1	0
2	1	2	8041/3: Small cell carcinoma, NOS	3	3	0	1	1	0
2	1	2	8041/3: Small cell carcinoma, NOS	4	3	0	0	0	0
2	1	1	8041/3: Small cell carcinoma, NOS	3	3	0	0	0	0
2	1	1	8041/3: Small cell carcinoma, NOS	3	3	0	0	0	0
2	1	2	8041/3: Small cell carcinoma, NOS	4	3	1	0	0	0
2	1	2	8041/3: Small cell carcinoma, NOS	3	3	1	0	0	0
2	1	1	8041/3: Small cell carcinoma, NOS	1	3	0	1	0	0
2	1	2	8041/3: Small cell carcinoma, NOS	3	3	0	0	1	0
2	1	2	8041/3: Small cell carcinoma, NOS	3	3	1	0	1	0
2	1	2	8041/3: Small cell carcinoma, NOS	4	3	1	0	0	1
2	1	2	8041/3: Small cell carcinoma, NOS	4	3	0	0	0	0
2	1	1	8041/3: Small cell carcinoma, NOS	3	3	0	0	0	0
2	1	2	8041/3: Small cell carcinoma, NOS	3	3	0	0	0	0
2	1	1	8041/3: Small cell carcinoma, NOS	1	3	0	0	0	0
2	1	2	8041/3: Small cell carcinoma, NOS	4	3	1	0	0	0
2	1	2	8041/3: Small cell carcinoma, NOS	3	3	0	0	0	1
2	1	1	8041/3: Small cell carcinoma, NOS	1	3	1	0	0	1
2	1	1	8041/3: Small cell carcinoma, NOS	3	3	0	1	0	0
2	1	1	8041/3: Small cell carcinoma, NOS	3	3	0	0	0	1
2	1	2	8041/3: Small cell carcinoma, NOS	4	3	0	0	1	0
2	1	1	8041/3: Small cell carcinoma, NOS	3	3	1	0	1	0
1	1	2	8041/3: Small cell carcinoma, NOS	3	3	1	0	1	0
1	1	1	8041/3: Small cell carcinoma, NOS	3	3	0	0	0	0
1	1	1	8041/3: Small cell carcinoma, NOS	3	3	0	0	0	0
1	1	1	8041/3: Small cell carcinoma, NOS	3	3	0	1	0	0
1	1	2	8041/3: Small cell carcinoma, NOS	1	3	0	1	0	0
1	1	2	8041/3: Small cell carcinoma, NOS	3	3	0	0	1	0
1	1	1	8041/3: Small cell carcinoma, NOS	3	3	1	0	1	0
1	1	2	8041/3: Small cell carcinoma, NOS	3	3	1	0	1	1
1	1	1	8041/3: Small cell carcinoma, NOS	3	3	0	0	0	0
1	1	1	8041/3: Small cell carcinoma, NOS	2	3	1	0	0	0
1	1	1	8041/3: Small cell carcinoma, NOS	2	3	0	1	0	0
1	1	1	8041/3: Small cell carcinoma, NOS	3	3	0	0	1	0
1	1	1	8041/3: Small cell carcinoma, NOS	3	3	1	0	1	0
1	1	1	8041/3: Small cell carcinoma, NOS	3	3	0	1	1	0
1	1	2	8041/3: Small cell carcinoma, NOS	2	3	1	1	1	0
1	1	1	8041/3: Small cell carcinoma, NOS	3	3	1	0	0	0
1	1	1	8041/3: Small cell carcinoma, NOS	3	3	0	1	0	0
1	1	2	8041/3: Small cell carcinoma, NOS	1	3	0	1	0	0
1	1	1	8041/3: Small cell carcinoma, NOS	1	3	0	1	0	0
1	1	1	8041/3: Small cell carcinoma, NOS	4	3	0	0	1	0
1	1	2	8041/3: Small cell carcinoma, NOS	1	3	0	0	1	0
1	1	2	8041/3: Small cell carcinoma, NOS	4	3	1	0	1	0
1	1	2	8041/3: Small cell carcinoma, NOS	3	3	1	0	1	0
1	1	1	8041/3: Small cell carcinoma, NOS	2	3	1	0	1	0
1	1	1	8041/3: Small cell carcinoma, NOS	3	3	0	0	0	1
1	1	1	8041/3: Small cell carcinoma, NOS	4	3	0	1	0	1
1	1	1	8041/3: Small cell carcinoma, NOS	3	3	0	1	0	1
1	1	2	8041/3: Small cell carcinoma, NOS	3	3	0	1	0	1
1	1	2	8041/3: Small cell carcinoma, NOS	4	3	0	0	1	1
1	1	2	8041/3: Small cell carcinoma, NOS	2	3	0	0	1	1
2	1	2	8041/3: Small cell carcinoma, NOS	4	3	0	0	0	0
2	1	1	8041/3: Small cell carcinoma, NOS	3	3	0	0	0	0
2	1	1	8041/3: Small cell carcinoma, NOS	1	3	0	0	0	0
2	1	2	8041/3: Small cell carcinoma, NOS	4	3	1	0	0	0
2	1	1	8041/3: Small cell carcinoma, NOS	3	3	1	0	0	0
2	1	2	8041/3: Small cell carcinoma, NOS	2	3	1	0	0	0
2	1	2	8041/3: Small cell carcinoma, NOS	3	3	0	1	0	0
2	1	2	8041/3: Small cell carcinoma, NOS	4	3	0	0	1	0
2	1	2	8041/3: Small cell carcinoma, NOS	3	3	0	0	1	0
2	1	1	8041/3: Small cell carcinoma, NOS	3	3	1	0	1	0
2	1	2	8041/3: Small cell carcinoma, NOS	1	3	1	0	1	0
2	1	1	8041/3: Small cell carcinoma, NOS	3	3	1	0	0	1
2	1	2	8041/3: Small cell carcinoma, NOS	1	3	0	0	0	0
2	1	1	8041/3: Small cell carcinoma, NOS	3	3	1	0	0	0
2	1	1	8041/3: Small cell carcinoma, NOS	3	3	0	1	0	0
2	1	1	8041/3: Small cell carcinoma, NOS	1	3	0	1	0	0
2	1	1	8041/3: Small cell carcinoma, NOS	3	3	0	0	0	1
2	1	1	8041/3: Small cell carcinoma, NOS	3	3	0	0	0	1
2	1	2	8041/3: Small cell carcinoma, NOS	1	3	1	0	0	1
2	1	1	8041/3: Small cell carcinoma, NOS	3	3	0	1	0	1
2	1	1	8041/3: Small cell carcinoma, NOS	3	3	0	0	1	1
2	1	2	8041/3: Small cell carcinoma, NOS	3	3	0	0	1	1
2	1	2	8041/3: Small cell carcinoma, NOS	3	3	1	0	1	1
2	1	1	8041/3: Small cell carcinoma, NOS	3	3	0	0	0	0
2	1	1	8041/3: Small cell carcinoma, NOS	3	3	0	0	0	0
2	1	1	8041/3: Small cell carcinoma, NOS	3	3	0	0	0	0
2	1	2	8041/3: Small cell carcinoma, NOS	4	3	0	1	0	0
2	1	2	8041/3: Small cell carcinoma, NOS	4	3	1	0	1	0
2	1	1	8041/3: Small cell carcinoma, NOS	3	3	1	0	1	0
2	1	2	8041/3: Small cell carcinoma, NOS	3	3	1	1	1	0
2	1	1	8041/3: Small cell carcinoma, NOS	1	3	1	1	1	0
2	1	2	8041/3: Small cell carcinoma, NOS	3	3	0	0	1	0
2	1	2	8041/3: Small cell carcinoma, NOS	1	3	1	0	0	1
2	1	2	8041/3: Small cell carcinoma, NOS	3	3	1	0	1	1
2	1	2	8041/3: Small cell carcinoma, NOS	4	3	0	0	1	0
1	1	1	8041/3: Small cell carcinoma, NOS	3	3	0	0	0	0
1	1	2	8041/3: Small cell carcinoma, NOS	3	3	1	0	1	0
1	1	2	8041/3: Small cell carcinoma, NOS	3	3	0	0	1	1
1	1	2	8041/3: Small cell carcinoma, NOS	4	3	1	0	1	1
1	1	2	8041/3: Small cell carcinoma, NOS	3	3	0	0	0	0
1	1	1	8041/3: Small cell carcinoma, NOS	3	3	0	0	1	0
1	1	1	8041/3: Small cell carcinoma, NOS	3	3	0	0	1	0
1	1	1	8041/3: Small cell carcinoma, NOS	3	3	1	1	1	1
1	1	1	8041/3: Small cell carcinoma, NOS	3	3	0	0	0	0
1	1	2	8041/3: Small cell carcinoma, NOS	3	3	0	0	0	0
1	1	2	8041/3: Small cell carcinoma, NOS	3	3	0	0	0	0
1	1	2	8041/3: Small cell carcinoma, NOS	2	3	0	0	0	0
1	1	1	8041/3: Small cell carcinoma, NOS	1	3	0	0	0	0
1	1	2	8041/3: Small cell carcinoma, NOS	3	3	1	0	0	0
1	1	2	8041/3: Small cell carcinoma, NOS	3	3	1	0	0	0
1	1	1	8041/3: Small cell carcinoma, NOS	4	3	1	1	0	0
1	1	1	8041/3: Small cell carcinoma, NOS	1	3	0	0	1	0
1	1	2	8041/3: Small cell carcinoma, NOS	4	3	1	0	1	0
1	1	1	8041/3: Small cell carcinoma, NOS	4	3	1	0	1	0
1	1	2	8041/3: Small cell carcinoma, NOS	3	3	0	0	0	1
1	1	2	8041/3: Small cell carcinoma, NOS	1	3	0	1	0	1
1	1	1	8041/3: Small cell carcinoma, NOS	4	3	0	0	0	0
1	1	1	8041/3: Small cell carcinoma, NOS	3	3	0	0	0	0
1	1	1	8041/3: Small cell carcinoma, NOS	3	3	1	0	0	0
1	1	2	8041/3: Small cell carcinoma, NOS	1	3	0	1	0	0
1	1	2	8041/3: Small cell carcinoma, NOS	3	3	0	1	1	0
1	1	2	8041/3: Small cell carcinoma, NOS	3	3	1	1	1	0
1	1	1	8041/3: Small cell carcinoma, NOS	4	3	1	0	1	1
1	1	2	8041/3: Small cell carcinoma, NOS	3	3	1	1	1	1
2	1	1	8041/3: Small cell carcinoma, NOS	3	3	0	0	0	0
2	1	2	8041/3: Small cell carcinoma, NOS	3	3	0	0	0	0
2	1	1	8041/3: Small cell carcinoma, NOS	3	3	0	0	0	0
2	1	2	8041/3: Small cell carcinoma, NOS	3	3	0	0	0	0
2	1	1	8041/3: Small cell carcinoma, NOS	1	3	0	0	0	0
2	1	2	8041/3: Small cell carcinoma, NOS	3	3	1	0	0	0
2	1	2	8041/3: Small cell carcinoma, NOS	3	3	1	0	0	0
2	1	2	8041/3: Small cell carcinoma, NOS	4	3	0	1	0	0
2	1	1	8041/3: Small cell carcinoma, NOS	3	3	0	0	1	0
2	1	2	8041/3: Small cell carcinoma, NOS	3	3	0	0	1	0
2	1	1	8041/3: Small cell carcinoma, NOS	3	3	0	0	1	0
2	1	2	8041/3: Small cell carcinoma, NOS	4	3	1	0	1	0
2	1	2	8041/3: Small cell carcinoma, NOS	3	3	1	0	1	0
2	1	2	8041/3: Small cell carcinoma, NOS	3	3	1	0	1	0
2	1	2	8041/3: Small cell carcinoma, NOS	3	3	0	0	0	1
2	1	1	8041/3: Small cell carcinoma, NOS	4	3	1	0	0	1
2	1	2	8041/3: Small cell carcinoma, NOS	4	3	0	1	0	1
2	1	1	8041/3: Small cell carcinoma, NOS	3	3	1	0	1	1
2	1	2	8041/3: Small cell carcinoma, NOS	1	3	0	1	1	1
2	1	2	8041/3: Small cell carcinoma, NOS	4	3	0	0	0	0
2	1	1	8041/3: Small cell carcinoma, NOS	3	3	0	0	0	0
2	1	1	8041/3: Small cell carcinoma, NOS	1	3	0	0	0	0
2	1	2	8041/3: Small cell carcinoma, NOS	3	3	0	1	0	0
2	1	1	8041/3: Small cell carcinoma, NOS	3	3	0	0	1	0
2	1	1	8041/3: Small cell carcinoma, NOS	3	3	1	0	1	0
2	1	1	8041/3: Small cell carcinoma, NOS	3	3	0	0	0	1
2	1	2	8041/3: Small cell carcinoma, NOS	4	3	1	1	0	1
2	1	1	8041/3: Small cell carcinoma, NOS	2	3	1	1	0	1
2	1	1	8041/3: Small cell carcinoma, NOS	3	3	0	0	1	1
2	1	1	8041/3: Small cell carcinoma, NOS	3	3	1	0	0	0
2	1	1	8041/3: Small cell carcinoma, NOS	3	3	0	0	1	0
2	1	1	8041/3: Small cell carcinoma, NOS	4	3	1	0	1	0
2	1	2	8041/3: Small cell carcinoma, NOS	3	3	0	0	0	0
2	1	1	8041/3: Small cell carcinoma, NOS	3	3	0	0	0	0
2	1	2	8041/3: Small cell carcinoma, NOS	3	3	0	0	0	0
2	1	2	8041/3: Small cell carcinoma, NOS	1	3	0	0	0	1
1	1	1	8041/3: Small cell carcinoma, NOS	3	3	0	1	0	0
1	1	1	8041/3: Small cell carcinoma, NOS	3	3	0	0	0	0
1	1	1	8041/3: Small cell carcinoma, NOS	3	3	0	0	0	1
1	1	1	8041/3: Small cell carcinoma, NOS	3	3	1	0	0	0
1	1	1	8041/3: Small cell carcinoma, NOS	3	3	1	0	0	0
1	1	2	8041/3: Small cell carcinoma, NOS	3	3	0	1	1	1
1	1	2	8041/3: Small cell carcinoma, NOS	4	3	0	1	0	0
1	1	2	8041/3: Small cell carcinoma, NOS	3	3	0	1	0	0
1	1	2	8041/3: Small cell carcinoma, NOS	1	3	0	1	0	0
1	1	2	8041/3: Small cell carcinoma, NOS	4	3	1	1	0	0
1	1	1	8041/3: Small cell carcinoma, NOS	4	3	0	0	1	0
1	1	2	8041/3: Small cell carcinoma, NOS	3	3	0	0	1	0
1	1	1	8041/3: Small cell carcinoma, NOS	3	3	0	0	1	0
1	1	2	8041/3: Small cell carcinoma, NOS	1	3	1	0	1	0
1	1	2	8041/3: Small cell carcinoma, NOS	3	3	1	0	0	0
1	1	2	8041/3: Small cell carcinoma, NOS	1	3	0	1	0	0
1	1	2	8041/3: Small cell carcinoma, NOS	3	3	0	0	0	1
1	1	2	8041/3: Small cell carcinoma, NOS	4	3	0	1	0	1
1	1	2	8041/3: Small cell carcinoma, NOS	4	3	0	1	0	1
2	1	1	8041/3: Small cell carcinoma, NOS	4	3	1	0	0	0
2	1	2	8041/3: Small cell carcinoma, NOS	3	3	1	0	0	0
2	1	2	8041/3: Small cell carcinoma, NOS	3	3	0	1	0	0
2	1	2	8041/3: Small cell carcinoma, NOS	3	3	0	1	0	0
2	1	2	8041/3: Small cell carcinoma, NOS	4	3	0	0	1	0
2	1	2	8041/3: Small cell carcinoma, NOS	3	3	0	0	1	0
2	1	2	8041/3: Small cell carcinoma, NOS	3	3	0	0	1	0
2	1	2	8041/3: Small cell carcinoma, NOS	1	3	0	1	1	0
2	1	1	8041/3: Small cell carcinoma, NOS	3	3	1	1	1	0
2	1	2	8041/3: Small cell carcinoma, NOS	3	3	0	0	0	0
2	1	1	8041/3: Small cell carcinoma, NOS	3	3	1	0	0	0
2	1	2	8041/3: Small cell carcinoma, NOS	3	3	1	0	0	0
2	1	2	8041/3: Small cell carcinoma, NOS	3	3	0	1	0	0
2	1	1	8041/3: Small cell carcinoma, NOS	1	3	0	0	1	0
2	1	1	8041/3: Small cell carcinoma, NOS	4	3	1	0	1	0
2	1	2	8041/3: Small cell carcinoma, NOS	3	3	1	0	1	0
2	1	1	8041/3: Small cell carcinoma, NOS	3	3	1	0	1	0
2	1	2	8041/3: Small cell carcinoma, NOS	3	3	1	0	1	0
2	1	1	8041/3: Small cell carcinoma, NOS	3	3	0	0	0	1
2	1	2	8041/3: Small cell carcinoma, NOS	3	3	1	0	1	1
2	1	2	8041/3: Small cell carcinoma, NOS	3	3	1	0	0	0
2	1	1	8041/3: Small cell carcinoma, NOS	3	3	0	0	1	0
2	1	1	8041/3: Small cell carcinoma, NOS	3	3	0	0	1	0
2	1	2	8041/3: Small cell carcinoma, NOS	3	3	0	0	0	1
2	1	1	8041/3: Small cell carcinoma, NOS	4	3	0	0	0	0
2	1	1	8041/3: Small cell carcinoma, NOS	3	3	0	0	0	0
2	1	1	8041/3: Small cell carcinoma, NOS	3	3	0	0	0	0
2	1	1	8041/3: Small cell carcinoma, NOS	3	3	0	0	1	0
2	1	2	8041/3: Small cell carcinoma, NOS	2	3	0	0	1	0
2	1	1	8041/3: Small cell carcinoma, NOS	3	3	0	1	1	0
2	1	2	8041/3: Small cell carcinoma, NOS	4	3	0	0	1	1
2	1	2	8041/3: Small cell carcinoma, NOS	3	3	0	0	1	0
2	1	2	8041/3: Small cell carcinoma, NOS	4	3	0	1	1	1
1	1	1	8041/3: Small cell carcinoma, NOS	3	3	0	0	0	0
1	1	2	8041/3: Small cell carcinoma, NOS	2	3	1	0	1	1
1	1	1	8041/3: Small cell carcinoma, NOS	3	3	1	0	0	0
1	1	2	8041/3: Small cell carcinoma, NOS	1	3	0	1	0	0
1	1	2	8041/3: Small cell carcinoma, NOS	4	3	0	0	1	0
1	1	2	8041/3: Small cell carcinoma, NOS	3	3	0	0	1	0
1	1	2	8041/3: Small cell carcinoma, NOS	1	3	0	1	1	0
1	1	2	8041/3: Small cell carcinoma, NOS	4	3	1	1	0	1
1	1	2	8041/3: Small cell carcinoma, NOS	4	3	0	0	1	0
1	1	1	8041/3: Small cell carcinoma, NOS	3	3	1	0	1	0
1	1	1	8041/3: Small cell carcinoma, NOS	3	3	0	1	1	0
2	1	1	8041/3: Small cell carcinoma, NOS	3	3	1	0	0	0
2	1	1	8041/3: Small cell carcinoma, NOS	3	3	0	0	1	0
2	1	2	8041/3: Small cell carcinoma, NOS	3	3	0	0	0	0
2	1	1	8041/3: Small cell carcinoma, NOS	1	3	0	0	0	0
2	1	2	8041/3: Small cell carcinoma, NOS	4	3	0	0	1	0
2	1	2	8041/3: Small cell carcinoma, NOS	4	3	0	0	1	0
2	1	1	8041/3: Small cell carcinoma, NOS	3	3	1	0	1	0
2	1	2	8041/3: Small cell carcinoma, NOS	3	3	0	0	0	1
2	1	2	8041/3: Small cell carcinoma, NOS	3	3	1	0	1	1
2	1	1	8041/3: Small cell carcinoma, NOS	3	3	0	1	1	1
2	1	2	8041/3: Small cell carcinoma, NOS	4	3	0	0	0	0
2	1	1	8041/3: Small cell carcinoma, NOS	1	3	0	0	0	0
2	1	2	8041/3: Small cell carcinoma, NOS	4	3	0	0	0	0
2	1	1	8041/3: Small cell carcinoma, NOS	3	3	1	0	0	0
2	1	1	8041/3: Small cell carcinoma, NOS	3	3	0	0	0	1
2	1	2	8041/3: Small cell carcinoma, NOS	3	3	0	1	1	0
2	1	2	8041/3: Small cell carcinoma, NOS	1	3	0	1	1	0
1	1	2	8041/3: Small cell carcinoma, NOS	3	3	1	0	0	0
1	1	1	8041/3: Small cell carcinoma, NOS	4	3	0	0	0	0
1	1	2	8041/3: Small cell carcinoma, NOS	4	3	1	0	0	1
1	1	1	8041/3: Small cell carcinoma, NOS	1	3	0	1	1	1
1	1	2	8041/3: Small cell carcinoma, NOS	4	3	1	0	0	0
1	1	1	8041/3: Small cell carcinoma, NOS	3	3	0	1	0	0
1	1	2	8041/3: Small cell carcinoma, NOS	3	3	0	1	0	0
1	1	2	8041/3: Small cell carcinoma, NOS	1	3	1	0	1	0
1	1	2	8041/3: Small cell carcinoma, NOS	4	3	1	0	1	1
1	1	1	8041/3: Small cell carcinoma, NOS	4	3	0	0	0	0
1	1	1	8041/3: Small cell carcinoma, NOS	3	3	0	0	0	0
1	1	1	8041/3: Small cell carcinoma, NOS	4	3	0	0	1	0
1	1	2	8041/3: Small cell carcinoma, NOS	3	3	1	0	1	0
1	1	2	8041/3: Small cell carcinoma, NOS	4	3	1	1	1	0
1	1	1	8041/3: Small cell carcinoma, NOS	3	3	1	0	0	0
1	1	2	8041/3: Small cell carcinoma, NOS	3	3	0	1	0	0
1	1	1	8041/3: Small cell carcinoma, NOS	1	3	0	1	0	0
1	1	2	8041/3: Small cell carcinoma, NOS	3	3	0	1	0	1
2	1	2	8041/3: Small cell carcinoma, NOS	4	3	0	0	0	0
2	1	1	8041/3: Small cell carcinoma, NOS	1	3	0	0	0	0
2	1	1	8041/3: Small cell carcinoma, NOS	3	3	0	1	0	0
2	1	1	8041/3: Small cell carcinoma, NOS	3	3	0	1	0	0
2	1	2	8041/3: Small cell carcinoma, NOS	4	3	1	1	0	0
2	1	1	8041/3: Small cell carcinoma, NOS	3	3	0	0	1	0
2	1	2	8041/3: Small cell carcinoma, NOS	3	3	1	0	1	0
2	1	2	8041/3: Small cell carcinoma, NOS	2	3	0	0	0	0
2	1	2	8041/3: Small cell carcinoma, NOS	4	3	0	0	1	0
2	1	1	8041/3: Small cell carcinoma, NOS	1	3	0	0	1	0
2	1	1	8041/3: Small cell carcinoma, NOS	3	3	0	1	0	1
2	1	1	8041/3: Small cell carcinoma, NOS	3	3	0	1	0	1
2	1	1	8041/3: Small cell carcinoma, NOS	3	3	0	0	0	0
2	1	2	8041/3: Small cell carcinoma, NOS	3	3	0	0	0	0
2	1	1	8041/3: Small cell carcinoma, NOS	1	3	0	0	0	0
2	1	2	8041/3: Small cell carcinoma, NOS	4	3	0	1	0	1
2	1	1	8041/3: Small cell carcinoma, NOS	3	3	0	0	1	1
2	1	2	8041/3: Small cell carcinoma, NOS	3	3	0	0	1	1
2	1	2	8041/3: Small cell carcinoma, NOS	3	3	1	0	1	1
1	1	1	8041/3: Small cell carcinoma, NOS	4	3	1	1	1	0
1	1	1	8041/3: Small cell carcinoma, NOS	3	3	0	0	1	0
1	1	1	8041/3: Small cell carcinoma, NOS	3	3	0	0	0	0
1	1	2	8041/3: Small cell carcinoma, NOS	3	3	0	0	1	0
1	1	1	8041/3: Small cell carcinoma, NOS	4	3	1	1	0	1
1	1	1	8041/3: Small cell carcinoma, NOS	4	3	0	0	0	0
1	1	1	8041/3: Small cell carcinoma, NOS	3	3	0	0	0	0
1	1	2	8041/3: Small cell carcinoma, NOS	3	3	0	0	0	0
1	1	1	8041/3: Small cell carcinoma, NOS	1	3	0	0	0	0
1	1	1	8041/3: Small cell carcinoma, NOS	3	3	1	0	0	0
1	1	1	8041/3: Small cell carcinoma, NOS	3	3	0	1	0	0
1	1	1	8041/3: Small cell carcinoma, NOS	3	3	0	1	0	0
1	1	1	8041/3: Small cell carcinoma, NOS	3	3	0	0	1	0
1	1	2	8041/3: Small cell carcinoma, NOS	3	3	0	0	1	0
1	1	1	8041/3: Small cell carcinoma, NOS	3	3	0	0	1	0
1	1	2	8041/3: Small cell carcinoma, NOS	4	3	1	0	1	0
1	1	1	8041/3: Small cell carcinoma, NOS	4	3	1	0	1	0
1	1	1	8041/3: Small cell carcinoma, NOS	4	3	1	0	1	0
1	1	2	8041/3: Small cell carcinoma, NOS	3	3	1	0	1	0
1	1	2	8041/3: Small cell carcinoma, NOS	3	3	0	1	1	0
1	1	2	8041/3: Small cell carcinoma, NOS	4	3	1	0	0	1
1	1	2	8041/3: Small cell carcinoma, NOS	1	3	0	1	0	1
1	1	2	8041/3: Small cell carcinoma, NOS	3	3	0	0	1	1
1	1	2	8041/3: Small cell carcinoma, NOS	4	3	0	1	1	1
1	1	1	8041/3: Small cell carcinoma, NOS	4	3	0	0	0	0
1	1	2	8041/3: Small cell carcinoma, NOS	4	3	0	0	0	0
1	1	1	8041/3: Small cell carcinoma, NOS	4	3	0	0	0	0
1	1	2	8041/3: Small cell carcinoma, NOS	4	3	0	0	0	0
1	1	2	8041/3: Small cell carcinoma, NOS	2	3	0	0	0	0
1	1	1	8041/3: Small cell carcinoma, NOS	1	3	0	0	0	0
1	1	1	8041/3: Small cell carcinoma, NOS	4	3	1	0	0	0
1	1	1	8041/3: Small cell carcinoma, NOS	4	3	0	1	0	0
1	1	2	8041/3: Small cell carcinoma, NOS	3	3	0	1	0	0
1	1	2	8041/3: Small cell carcinoma, NOS	1	3	0	1	0	0
1	1	2	8041/3: Small cell carcinoma, NOS	4	3	1	1	0	0
1	1	2	8041/3: Small cell carcinoma, NOS	4	3	1	1	0	0
1	1	2	8041/3: Small cell carcinoma, NOS	3	3	1	1	0	0
1	1	2	8041/3: Small cell carcinoma, NOS	4	3	0	0	1	0
1	1	2	8041/3: Small cell carcinoma, NOS	3	3	0	0	1	0
1	1	2	8041/3: Small cell carcinoma, NOS	3	3	0	0	1	0
1	1	2	8041/3: Small cell carcinoma, NOS	3	3	0	0	1	0
1	1	2	8041/3: Small cell carcinoma, NOS	3	3	0	0	1	0
1	1	1	8041/3: Small cell carcinoma, NOS	3	3	0	0	1	0
1	1	2	8041/3: Small cell carcinoma, NOS	1	3	0	0	1	0
1	1	2	8041/3: Small cell carcinoma, NOS	4	3	1	0	1	0
1	1	2	8041/3: Small cell carcinoma, NOS	4	3	1	0	1	0
1	1	2	8041/3: Small cell carcinoma, NOS	3	3	1	0	1	0
1	1	1	8041/3: Small cell carcinoma, NOS	3	3	1	0	1	0
1	1	2	8041/3: Small cell carcinoma, NOS	3	3	1	0	1	0
1	1	1	8041/3: Small cell carcinoma, NOS	1	3	1	0	1	0
1	1	1	8041/3: Small cell carcinoma, NOS	3	3	1	1	1	0
1	1	1	8041/3: Small cell carcinoma, NOS	3	3	0	0	0	1
1	1	2	8041/3: Small cell carcinoma, NOS	4	3	0	0	1	1
1	1	1	8041/3: Small cell carcinoma, NOS	4	3	1	0	1	1
1	1	2	8041/3: Small cell carcinoma, NOS	3	3	1	0	1	1
1	1	1	8041/3: Small cell carcinoma, NOS	4	3	0	0	0	0
1	1	1	8041/3: Small cell carcinoma, NOS	4	3	0	0	0	0
1	1	1	8041/3: Small cell carcinoma, NOS	4	3	0	0	0	0
1	1	1	8041/3: Small cell carcinoma, NOS	3	3	0	0	0	0
1	1	2	8041/3: Small cell carcinoma, NOS	3	3	0	0	0	0
1	1	2	8041/3: Small cell carcinoma, NOS	1	3	0	0	0	0
1	1	1	8041/3: Small cell carcinoma, NOS	4	3	1	0	0	0
1	1	2	8041/3: Small cell carcinoma, NOS	4	3	1	0	0	0
1	1	2	8041/3: Small cell carcinoma, NOS	4	3	0	1	0	0
1	1	2	8041/3: Small cell carcinoma, NOS	3	3	0	1	0	0
1	1	2	8041/3: Small cell carcinoma, NOS	4	3	1	0	1	0
1	1	1	8041/3: Small cell carcinoma, NOS	4	3	1	0	1	0
1	1	2	8041/3: Small cell carcinoma, NOS	4	3	1	0	1	0
1	1	2	8041/3: Small cell carcinoma, NOS	3	3	1	0	1	0
1	1	2	8041/3: Small cell carcinoma, NOS	3	3	1	0	1	0
1	1	2	8041/3: Small cell carcinoma, NOS	3	3	1	0	1	0
1	1	2	8041/3: Small cell carcinoma, NOS	3	3	1	1	1	0
1	1	2	8041/3: Small cell carcinoma, NOS	3	3	0	0	0	1
1	1	2	8041/3: Small cell carcinoma, NOS	3	3	0	1	0	1
1	1	1	8041/3: Small cell carcinoma, NOS	2	3	1	1	0	1
1	1	1	8041/3: Small cell carcinoma, NOS	1	3	1	0	1	1
2	1	2	8041/3: Small cell carcinoma, NOS	4	3	0	0	0	0
2	1	1	8041/3: Small cell carcinoma, NOS	3	3	0	0	0	0
2	1	2	8041/3: Small cell carcinoma, NOS	3	3	0	0	0	0
2	1	1	8041/3: Small cell carcinoma, NOS	3	3	0	0	0	0
2	1	1	8041/3: Small cell carcinoma, NOS	3	3	0	0	0	0
2	1	2	8041/3: Small cell carcinoma, NOS	3	3	0	0	0	0
2	1	2	8041/3: Small cell carcinoma, NOS	3	3	0	0	0	0
2	1	1	8041/3: Small cell carcinoma, NOS	1	3	0	0	0	0
2	1	2	8041/3: Small cell carcinoma, NOS	1	3	0	0	0	0
2	1	1	8041/3: Small cell carcinoma, NOS	1	3	0	0	0	0
2	1	1	8041/3: Small cell carcinoma, NOS	4	3	1	0	0	0
2	1	1	8041/3: Small cell carcinoma, NOS	2	3	1	0	0	0
2	1	1	8041/3: Small cell carcinoma, NOS	1	3	1	0	0	0
2	1	2	8041/3: Small cell carcinoma, NOS	3	3	0	1	0	0
2	1	2	8041/3: Small cell carcinoma, NOS	3	3	0	0	1	0
2	1	1	8041/3: Small cell carcinoma, NOS	3	3	0	0	1	0
2	1	1	8041/3: Small cell carcinoma, NOS	3	3	0	0	1	0
2	1	1	8041/3: Small cell carcinoma, NOS	3	3	0	0	1	0
2	1	2	8041/3: Small cell carcinoma, NOS	4	3	1	0	1	0
2	1	2	8041/3: Small cell carcinoma, NOS	4	3	1	0	1	0
2	1	1	8041/3: Small cell carcinoma, NOS	3	3	1	0	1	0
2	1	2	8041/3: Small cell carcinoma, NOS	3	3	1	0	1	0
2	1	2	8041/3: Small cell carcinoma, NOS	3	3	1	0	1	0
2	1	2	8041/3: Small cell carcinoma, NOS	3	3	0	1	1	0
2	1	2	8041/3: Small cell carcinoma, NOS	3	3	1	1	1	0
2	1	1	8041/3: Small cell carcinoma, NOS	1	3	1	1	1	0
2	1	1	8041/3: Small cell carcinoma, NOS	1	3	1	1	1	0
2	1	2	8041/3: Small cell carcinoma, NOS	4	3	0	0	0	1
2	1	2	8041/3: Small cell carcinoma, NOS	3	3	0	0	0	1
2	1	2	8041/3: Small cell carcinoma, NOS	1	3	0	1	0	1
2	1	2	8041/3: Small cell carcinoma, NOS	3	3	1	0	1	1
2	1	2	8041/3: Small cell carcinoma, NOS	4	3	0	1	1	1
2	1	2	8041/3: Small cell carcinoma, NOS	4	3	0	0	0	0
2	1	1	8041/3: Small cell carcinoma, NOS	4	3	0	0	0	0
2	1	1	8041/3: Small cell carcinoma, NOS	3	3	0	0	0	0
2	1	2	8041/3: Small cell carcinoma, NOS	3	3	0	0	0	0
2	1	1	8041/3: Small cell carcinoma, NOS	3	3	0	0	0	0
2	1	2	8041/3: Small cell carcinoma, NOS	3	3	0	0	0	0
2	1	1	8041/3: Small cell carcinoma, NOS	3	3	0	0	0	0
2	1	1	8041/3: Small cell carcinoma, NOS	1	3	0	0	0	0
2	1	2	8041/3: Small cell carcinoma, NOS	1	3	0	1	0	0
2	1	1	8041/3: Small cell carcinoma, NOS	4	3	0	0	1	0
2	1	2	8041/3: Small cell carcinoma, NOS	4	3	0	0	1	0
2	1	1	8041/3: Small cell carcinoma, NOS	2	3	0	0	1	0
2	1	1	8041/3: Small cell carcinoma, NOS	4	3	1	0	1	0
2	1	1	8041/3: Small cell carcinoma, NOS	3	3	0	1	1	0
2	1	2	8041/3: Small cell carcinoma, NOS	3	3	0	1	1	0
2	1	1	8041/3: Small cell carcinoma, NOS	2	3	1	1	1	0
2	1	1	8041/3: Small cell carcinoma, NOS	3	3	0	0	0	0
2	1	1	8041/3: Small cell carcinoma, NOS	1	3	0	0	0	0
2	1	1	8041/3: Small cell carcinoma, NOS	1	3	0	0	0	0
2	1	2	8041/3: Small cell carcinoma, NOS	4	3	1	0	0	0
2	1	2	8041/3: Small cell carcinoma, NOS	3	3	1	0	0	0
2	1	1	8041/3: Small cell carcinoma, NOS	3	3	0	1	0	0
2	1	1	8041/3: Small cell carcinoma, NOS	3	3	0	1	0	0
2	1	2	8041/3: Small cell carcinoma, NOS	4	3	0	0	1	0
2	1	2	8041/3: Small cell carcinoma, NOS	3	3	0	0	1	0
2	1	1	8041/3: Small cell carcinoma, NOS	3	3	0	0	1	0
2	1	1	8041/3: Small cell carcinoma, NOS	3	3	0	0	1	0
2	1	1	8041/3: Small cell carcinoma, NOS	3	3	0	0	1	0
2	1	2	8041/3: Small cell carcinoma, NOS	3	3	1	0	1	0
2	1	2	8041/3: Small cell carcinoma, NOS	3	3	1	0	1	0
2	1	1	8041/3: Small cell carcinoma, NOS	3	3	1	1	1	0
2	1	2	8041/3: Small cell carcinoma, NOS	3	3	0	0	0	1
2	1	2	8041/3: Small cell carcinoma, NOS	3	3	0	0	0	1
2	1	2	8041/3: Small cell carcinoma, NOS	3	3	0	0	0	1
2	1	2	8041/3: Small cell carcinoma, NOS	2	3	1	0	0	1
2	1	2	8041/3: Small cell carcinoma, NOS	4	3	0	0	1	1
2	1	1	8041/3: Small cell carcinoma, NOS	4	3	1	0	1	1
2	1	2	8041/3: Small cell carcinoma, NOS	4	3	0	0	0	0
2	1	1	8041/3: Small cell carcinoma, NOS	3	3	0	0	0	0
2	1	1	8041/3: Small cell carcinoma, NOS	3	3	0	0	0	0
2	1	2	8041/3: Small cell carcinoma, NOS	1	3	0	0	0	0
2	1	1	8041/3: Small cell carcinoma, NOS	3	3	0	0	1	0
2	1	2	8041/3: Small cell carcinoma, NOS	3	3	0	0	1	0
2	1	1	8041/3: Small cell carcinoma, NOS	3	3	1	1	1	0
2	1	2	8041/3: Small cell carcinoma, NOS	3	3	0	0	1	1
2	1	1	8041/3: Small cell carcinoma, NOS	4	3	0	0	0	0
2	1	1	8041/3: Small cell carcinoma, NOS	3	3	0	0	0	0
2	1	1	8041/3: Small cell carcinoma, NOS	3	3	0	0	1	0
2	1	1	8041/3: Small cell carcinoma, NOS	3	3	0	0	1	0
2	1	1	8041/3: Small cell carcinoma, NOS	1	3	0	0	1	0
2	1	1	8041/3: Small cell carcinoma, NOS	3	3	1	0	1	0
1	1	1	8041/3: Small cell carcinoma, NOS	4	3	0	0	0	0
1	1	2	8041/3: Small cell carcinoma, NOS	4	3	0	1	1	0
1	1	1	8041/3: Small cell carcinoma, NOS	4	3	0	1	0	0
1	1	2	8041/3: Small cell carcinoma, NOS	3	3	0	1	0	0
1	1	2	8041/3: Small cell carcinoma, NOS	4	3	1	0	0	0
1	1	1	8041/3: Small cell carcinoma, NOS	4	3	1	0	0	0
1	1	1	8041/3: Small cell carcinoma, NOS	3	3	0	0	1	0
1	1	1	8041/3: Small cell carcinoma, NOS	3	3	0	0	1	1
1	1	2	8041/3: Small cell carcinoma, NOS	3	3	1	0	1	1
1	1	2	8041/3: Small cell carcinoma, NOS	3	3	0	0	0	0
1	1	1	8041/3: Small cell carcinoma, NOS	4	3	0	1	0	0
1	1	2	8041/3: Small cell carcinoma, NOS	3	3	0	1	0	0
1	1	1	8041/3: Small cell carcinoma, NOS	3	3	0	1	0	0
1	1	2	8041/3: Small cell carcinoma, NOS	2	3	0	1	0	0
1	1	1	8041/3: Small cell carcinoma, NOS	3	3	0	0	1	0
1	1	1	8041/3: Small cell carcinoma, NOS	3	3	1	0	1	0
2	1	2	8041/3: Small cell carcinoma, NOS	3	3	0	0	0	0
2	1	2	8041/3: Small cell carcinoma, NOS	3	3	1	0	0	0
2	1	1	8041/3: Small cell carcinoma, NOS	3	3	0	0	1	0
2	1	2	8041/3: Small cell carcinoma, NOS	4	3	1	0	1	0
2	1	2	8041/3: Small cell carcinoma, NOS	3	3	0	0	0	1
2	1	2	8041/3: Small cell carcinoma, NOS	3	3	0	0	0	0
2	1	2	8041/3: Small cell carcinoma, NOS	3	3	0	1	0	0
2	1	2	8041/3: Small cell carcinoma, NOS	3	3	0	0	1	0
2	1	2	8041/3: Small cell carcinoma, NOS	3	3	1	0	1	1
2	1	1	8041/3: Small cell carcinoma, NOS	3	3	0	0	0	0
2	1	2	8041/3: Small cell carcinoma, NOS	2	3	0	0	0	0
2	1	1	8041/3: Small cell carcinoma, NOS	3	3	0	0	1	0
2	1	1	8041/3: Small cell carcinoma, NOS	3	3	0	1	1	0
2	1	1	8041/3: Small cell carcinoma, NOS	3	3	0	0	0	1
2	1	2	8041/3: Small cell carcinoma, NOS	3	3	0	1	0	1
2	1	2	8041/3: Small cell carcinoma, NOS	3	3	1	0	0	0
2	1	1	8041/3: Small cell carcinoma, NOS	4	3	0	1	1	0
1	1	2	8041/3: Small cell carcinoma, NOS	4	3	0	0	0	0
1	1	1	8041/3: Small cell carcinoma, NOS	3	3	1	0	1	0
1	1	2	8041/3: Small cell carcinoma, NOS	1	3	1	0	0	0
1	1	1	8041/3: Small cell carcinoma, NOS	3	3	0	1	0	0
1	1	2	8041/3: Small cell carcinoma, NOS	3	3	0	0	1	0
1	1	2	8041/3: Small cell carcinoma, NOS	3	3	0	0	0	1
1	1	1	8041/3: Small cell carcinoma, NOS	4	3	0	0	0	0
1	1	2	8041/3: Small cell carcinoma, NOS	3	3	1	0	0	0
1	1	2	8041/3: Small cell carcinoma, NOS	3	3	1	0	1	0
1	1	2	8041/3: Small cell carcinoma, NOS	4	3	0	0	0	1
2	1	1	8041/3: Small cell carcinoma, NOS	3	3	0	0	0	0
2	1	1	8041/3: Small cell carcinoma, NOS	4	3	0	1	0	0
2	1	1	8041/3: Small cell carcinoma, NOS	3	3	0	1	0	0
2	1	2	8041/3: Small cell carcinoma, NOS	3	3	1	0	1	0
2	1	2	8041/3: Small cell carcinoma, NOS	3	3	1	0	1	0
2	1	2	8041/3: Small cell carcinoma, NOS	3	3	0	0	0	1
2	1	2	8041/3: Small cell carcinoma, NOS	3	3	0	0	0	0
2	1	1	8041/3: Small cell carcinoma, NOS	3	3	1	0	0	0
2	1	1	8041/3: Small cell carcinoma, NOS	3	3	1	0	0	0
2	1	1	8041/3: Small cell carcinoma, NOS	3	3	1	0	0	0
2	1	1	8041/3: Small cell carcinoma, NOS	3	3	0	0	0	1
2	1	1	8041/3: Small cell carcinoma, NOS	3	3	1	0	1	1
2	1	1	8041/3: Small cell carcinoma, NOS	3	3	0	1	0	0
2	1	1	8041/3: Small cell carcinoma, NOS	1	3	0	0	1	0
2	1	1	8041/3: Small cell carcinoma, NOS	3	3	0	0	1	1
2	1	2	8041/3: Small cell carcinoma, NOS	2	3	0	0	0	1
1	1	2	8041/3: Small cell carcinoma, NOS	2	3	0	0	0	0
1	1	2	8041/3: Small cell carcinoma, NOS	3	3	1	0	0	0
1	1	2	8041/3: Small cell carcinoma, NOS	4	3	1	0	1	0
1	1	2	8041/3: Small cell carcinoma, NOS	4	3	0	0	0	0
1	1	2	8041/3: Small cell carcinoma, NOS	4	3	1	0	0	0
1	1	1	8041/3: Small cell carcinoma, NOS	3	3	1	0	0	0
1	1	1	8041/3: Small cell carcinoma, NOS	1	3	0	1	0	0
1	1	2	8041/3: Small cell carcinoma, NOS	4	3	0	0	1	0
1	1	2	8041/3: Small cell carcinoma, NOS	3	3	0	0	1	0
1	1	2	8041/3: Small cell carcinoma, NOS	3	3	1	0	1	0
1	1	1	8041/3: Small cell carcinoma, NOS	3	3	1	0	1	0
1	1	1	8041/3: Small cell carcinoma, NOS	4	3	1	1	1	0
1	1	2	8041/3: Small cell carcinoma, NOS	3	3	0	0	1	1
1	1	2	8041/3: Small cell carcinoma, NOS	4	3	1	0	1	1
1	1	2	8041/3: Small cell carcinoma, NOS	4	3	0	0	0	0
1	1	2	8041/3: Small cell carcinoma, NOS	4	3	1	0	0	0
1	1	2	8041/3: Small cell carcinoma, NOS	4	3	1	1	0	0
1	1	2	8041/3: Small cell carcinoma, NOS	4	3	1	0	1	0
1	1	2	8041/3: Small cell carcinoma, NOS	3	3	1	0	1	0
1	1	2	8041/3: Small cell carcinoma, NOS	3	3	0	1	1	0
1	1	2	8041/3: Small cell carcinoma, NOS	3	3	1	0	0	1
2	1	1	8041/3: Small cell carcinoma, NOS	3	3	0	0	0	0
2	1	1	8041/3: Small cell carcinoma, NOS	1	3	0	1	0	0
2	1	2	8041/3: Small cell carcinoma, NOS	3	3	1	1	0	0
2	1	2	8041/3: Small cell carcinoma, NOS	4	3	0	0	1	0
2	1	2	8041/3: Small cell carcinoma, NOS	4	3	0	0	0	1
2	1	1	8041/3: Small cell carcinoma, NOS	3	3	0	0	0	1
2	1	2	8041/3: Small cell carcinoma, NOS	4	3	1	0	0	1
2	1	1	8041/3: Small cell carcinoma, NOS	3	3	0	1	0	1
2	1	2	8041/3: Small cell carcinoma, NOS	4	3	1	0	0	0
2	1	2	8041/3: Small cell carcinoma, NOS	2	3	0	1	0	0
2	1	2	8041/3: Small cell carcinoma, NOS	3	3	0	0	0	1
2	1	2	8041/3: Small cell carcinoma, NOS	2	3	1	0	0	1
2	1	1	8041/3: Small cell carcinoma, NOS	3	3	0	0	0	0
2	1	2	8041/3: Small cell carcinoma, NOS	2	3	0	1	0	0
2	1	2	8041/3: Small cell carcinoma, NOS	3	3	0	0	1	0
2	1	1	8041/3: Small cell carcinoma, NOS	3	3	0	0	1	0
2	1	2	8041/3: Small cell carcinoma, NOS	2	3	1	1	1	0
2	1	2	8041/3: Small cell carcinoma, NOS	3	3	1	0	0	0
2	1	1	8041/3: Small cell carcinoma, NOS	3	3	0	0	1	1
2	1	2	8041/3: Small cell carcinoma, NOS	4	3	1	0	0	0
1	1	1	8041/3: Small cell carcinoma, NOS	4	3	1	0	0	0
1	1	1	8041/3: Small cell carcinoma, NOS	4	3	1	0	0	0
1	1	2	8041/3: Small cell carcinoma, NOS	3	3	0	1	0	0
1	1	2	8041/3: Small cell carcinoma, NOS	1	3	0	1	1	0
1	1	1	8041/3: Small cell carcinoma, NOS	3	3	0	1	1	1
1	1	2	8041/3: Small cell carcinoma, NOS	4	3	1	0	0	0
1	1	1	8041/3: Small cell carcinoma, NOS	4	3	0	1	1	0
1	1	2	8041/3: Small cell carcinoma, NOS	4	3	0	0	0	0
1	1	1	8041/3: Small cell carcinoma, NOS	3	3	0	1	0	0
1	1	2	8041/3: Small cell carcinoma, NOS	3	3	0	1	0	0
1	1	1	8041/3: Small cell carcinoma, NOS	4	3	0	0	1	0
1	1	2	8041/3: Small cell carcinoma, NOS	3	3	0	0	1	1
1	1	2	8041/3: Small cell carcinoma, NOS	4	3	0	0	0	0
1	1	2	8041/3: Small cell carcinoma, NOS	4	3	1	0	0	0
1	1	1	8041/3: Small cell carcinoma, NOS	4	3	1	0	0	0
2	1	1	8041/3: Small cell carcinoma, NOS	1	3	0	0	0	0
2	1	1	8041/3: Small cell carcinoma, NOS	3	3	1	0	0	0
2	1	1	8041/3: Small cell carcinoma, NOS	4	3	0	0	1	0
2	1	2	8041/3: Small cell carcinoma, NOS	3	3	1	1	1	0
2	1	2	8041/3: Small cell carcinoma, NOS	3	3	1	1	1	0
2	1	1	8041/3: Small cell carcinoma, NOS	4	3	0	0	0	1
2	1	1	8041/3: Small cell carcinoma, NOS	3	3	1	0	0	1
2	1	1	8041/3: Small cell carcinoma, NOS	1	3	1	0	0	0
2	1	2	8041/3: Small cell carcinoma, NOS	1	3	1	0	0	0
2	1	2	8041/3: Small cell carcinoma, NOS	3	3	0	0	1	0
2	1	2	8041/3: Small cell carcinoma, NOS	3	3	1	1	1	0
2	1	2	8041/3: Small cell carcinoma, NOS	3	3	0	0	1	1
2	1	2	8041/3: Small cell carcinoma, NOS	4	3	0	0	0	0
2	1	1	8041/3: Small cell carcinoma, NOS	4	3	0	0	0	0
2	1	2	8041/3: Small cell carcinoma, NOS	3	3	0	0	0	0
2	1	1	8041/3: Small cell carcinoma, NOS	3	3	0	0	0	0
2	1	1	8041/3: Small cell carcinoma, NOS	3	3	1	0	0	0
2	1	2	8041/3: Small cell carcinoma, NOS	3	3	0	1	0	0
2	1	2	8041/3: Small cell carcinoma, NOS	3	3	0	0	1	0
2	1	2	8041/3: Small cell carcinoma, NOS	4	3	1	0	1	0
2	1	1	8041/3: Small cell carcinoma, NOS	3	3	1	0	1	0
2	1	1	8041/3: Small cell carcinoma, NOS	3	3	1	0	0	1
2	1	1	8041/3: Small cell carcinoma, NOS	3	3	0	0	0	0
2	1	2	8041/3: Small cell carcinoma, NOS	4	3	0	0	1	0
2	1	2	8041/3: Small cell carcinoma, NOS	1	3	0	0	0	1
2	1	2	8041/3: Small cell carcinoma, NOS	3	3	0	0	0	0
1	1	2	8041/3: Small cell carcinoma, NOS	1	3	1	0	0	0
1	1	2	8041/3: Small cell carcinoma, NOS	3	3	0	0	1	0
1	1	2	8041/3: Small cell carcinoma, NOS	3	3	0	1	0	0
1	1	1	8041/3: Small cell carcinoma, NOS	2	3	0	1	0	0
1	1	1	8041/3: Small cell carcinoma, NOS	3	3	0	0	1	0
1	1	2	8041/3: Small cell carcinoma, NOS	4	3	1	0	0	0
1	1	2	8041/3: Small cell carcinoma, NOS	3	3	1	0	0	0
1	1	2	8041/3: Small cell carcinoma, NOS	4	3	0	1	0	0
1	1	2	8041/3: Small cell carcinoma, NOS	3	3	0	1	0	0
1	1	1	8041/3: Small cell carcinoma, NOS	4	3	0	0	0	0
1	1	2	8041/3: Small cell carcinoma, NOS	1	3	0	0	0	0
1	1	2	8041/3: Small cell carcinoma, NOS	3	3	1	1	0	0
1	1	1	8041/3: Small cell carcinoma, NOS	3	3	0	0	1	0
1	1	1	8041/3: Small cell carcinoma, NOS	3	3	0	1	0	1
1	1	2	8041/3: Small cell carcinoma, NOS	4	3	1	0	1	1
1	1	1	8041/3: Small cell carcinoma, NOS	3	3	1	0	1	1
2	1	2	8041/3: Small cell carcinoma, NOS	4	3	0	0	0	0
2	1	2	8041/3: Small cell carcinoma, NOS	3	3	0	0	0	0
2	1	2	8041/3: Small cell carcinoma, NOS	3	3	0	0	0	0
2	1	2	8041/3: Small cell carcinoma, NOS	2	3	0	0	0	0
2	1	2	8041/3: Small cell carcinoma, NOS	2	3	0	0	0	0
2	1	1	8041/3: Small cell carcinoma, NOS	1	3	0	1	0	0
2	1	2	8041/3: Small cell carcinoma, NOS	4	3	0	0	1	0
2	1	2	8041/3: Small cell carcinoma, NOS	3	3	1	0	1	0
2	1	2	8041/3: Small cell carcinoma, NOS	4	3	0	0	1	1
2	1	2	8041/3: Small cell carcinoma, NOS	4	3	0	0	0	0
2	1	2	8041/3: Small cell carcinoma, NOS	3	3	0	0	0	0
2	1	2	8041/3: Small cell carcinoma, NOS	3	3	1	0	0	0
2	1	1	8041/3: Small cell carcinoma, NOS	3	3	0	0	1	0
2	1	2	8041/3: Small cell carcinoma, NOS	3	3	0	0	1	0
2	1	1	8041/3: Small cell carcinoma, NOS	3	3	0	0	1	0
2	1	1	8041/3: Small cell carcinoma, NOS	3	3	1	0	1	0
2	1	2	8041/3: Small cell carcinoma, NOS	3	3	0	0	0	1
2	1	2	8041/3: Small cell carcinoma, NOS	3	3	1	0	0	1
2	1	1	8041/3: Small cell carcinoma, NOS	3	3	0	0	0	0
2	1	1	8041/3: Small cell carcinoma, NOS	3	3	0	0	0	0
2	1	1	8041/3: Small cell carcinoma, NOS	3	3	1	0	0	0
2	1	1	8041/3: Small cell carcinoma, NOS	3	3	0	1	0	0
2	1	2	8041/3: Small cell carcinoma, NOS	4	3	0	0	1	0
2	1	2	8041/3: Small cell carcinoma, NOS	3	3	1	0	1	0
2	1	1	8041/3: Small cell carcinoma, NOS	3	3	0	0	0	1
2	1	2	8041/3: Small cell carcinoma, NOS	4	3	1	0	0	1
2	1	2	8041/3: Small cell carcinoma, NOS	4	3	0	0	0	0
2	1	2	8041/3: Small cell carcinoma, NOS	4	3	1	0	0	0
2	1	2	8041/3: Small cell carcinoma, NOS	3	3	1	0	0	0
2	1	2	8041/3: Small cell carcinoma, NOS	3	3	0	0	0	0
2	1	1	8041/3: Small cell carcinoma, NOS	3	3	0	0	0	1
1	1	2	8041/3: Small cell carcinoma, NOS	3	3	0	0	0	1
1	1	1	8041/3: Small cell carcinoma, NOS	3	3	1	0	0	1
1	1	1	8041/3: Small cell carcinoma, NOS	4	3	0	0	0	0
1	1	1	8041/3: Small cell carcinoma, NOS	3	3	0	0	0	0
1	1	2	8041/3: Small cell carcinoma, NOS	3	3	0	1	0	0
1	1	1	8041/3: Small cell carcinoma, NOS	4	3	1	0	1	0
1	1	1	8041/3: Small cell carcinoma, NOS	4	3	0	0	0	1
1	1	1	8041/3: Small cell carcinoma, NOS	1	3	0	0	0	0
1	1	2	8041/3: Small cell carcinoma, NOS	4	3	0	1	0	0
1	1	1	8041/3: Small cell carcinoma, NOS	3	3	0	0	1	0
1	1	2	8041/3: Small cell carcinoma, NOS	3	3	0	0	1	0
1	1	1	8041/3: Small cell carcinoma, NOS	4	3	0	1	1	0
1	1	2	8041/3: Small cell carcinoma, NOS	4	3	0	1	1	1
1	1	2	8041/3: Small cell carcinoma, NOS	3	3	0	0	0	0
1	1	2	8041/3: Small cell carcinoma, NOS	3	3	1	0	0	0
1	1	2	8041/3: Small cell carcinoma, NOS	4	3	0	1	0	0
1	1	1	8041/3: Small cell carcinoma, NOS	2	3	0	1	0	0
1	1	1	8041/3: Small cell carcinoma, NOS	2	3	0	0	1	1
2	1	1	8041/3: Small cell carcinoma, NOS	3	3	0	0	0	0
2	1	2	8041/3: Small cell carcinoma, NOS	3	3	0	0	0	0
2	1	1	8041/3: Small cell carcinoma, NOS	3	3	0	0	0	0
2	1	1	8041/3: Small cell carcinoma, NOS	3	3	0	0	0	0
2	1	1	8041/3: Small cell carcinoma, NOS	3	3	0	0	0	1
2	1	1	8041/3: Small cell carcinoma, NOS	4	3	1	0	1	1
2	1	2	8041/3: Small cell carcinoma, NOS	3	3	0	1	0	0
2	1	1	8041/3: Small cell carcinoma, NOS	3	3	0	1	0	0
2	1	1	8041/3: Small cell carcinoma, NOS	2	3	0	1	0	0
2	1	1	8041/3: Small cell carcinoma, NOS	3	3	0	0	1	0
2	1	2	8041/3: Small cell carcinoma, NOS	3	3	0	0	1	0
2	1	1	8041/3: Small cell carcinoma, NOS	1	3	0	0	1	0
2	1	2	8041/3: Small cell carcinoma, NOS	3	3	1	0	1	0
2	1	2	8041/3: Small cell carcinoma, NOS	3	3	0	1	1	1
2	1	2	8041/3: Small cell carcinoma, NOS	1	3	0	0	0	0
2	1	1	8041/3: Small cell carcinoma, NOS	1	3	0	1	0	0
2	1	1	8041/3: Small cell carcinoma, NOS	3	3	1	0	0	0
2	1	2	8041/3: Small cell carcinoma, NOS	3	3	0	0	1	0
2	1	2	8041/3: Small cell carcinoma, NOS	4	3	1	0	1	1
1	1	2	8041/3: Small cell carcinoma, NOS	3	3	1	1	1	0
1	1	1	8041/3: Small cell carcinoma, NOS	3	3	0	0	0	0
1	1	2	8041/3: Small cell carcinoma, NOS	4	3	1	0	0	0
1	1	1	8041/3: Small cell carcinoma, NOS	4	3	0	0	0	0
1	1	2	8041/3: Small cell carcinoma, NOS	4	3	0	0	0	0
1	1	2	8041/3: Small cell carcinoma, NOS	3	3	0	0	0	0
1	1	1	8041/3: Small cell carcinoma, NOS	3	3	0	0	0	0
1	1	2	8041/3: Small cell carcinoma, NOS	3	3	0	1	0	0
1	1	2	8041/3: Small cell carcinoma, NOS	3	3	0	0	1	0
1	1	2	8041/3: Small cell carcinoma, NOS	4	3	1	0	1	0
1	1	1	8041/3: Small cell carcinoma, NOS	3	3	0	1	1	0
1	1	2	8041/3: Small cell carcinoma, NOS	3	3	0	1	1	0
1	1	1	8041/3: Small cell carcinoma, NOS	3	3	0	0	0	1
1	1	1	8041/3: Small cell carcinoma, NOS	4	3	1	0	0	0
1	1	2	8041/3: Small cell carcinoma, NOS	3	3	1	0	0	0
1	1	2	8041/3: Small cell carcinoma, NOS	3	3	1	0	0	0
1	1	2	8041/3: Small cell carcinoma, NOS	4	3	0	0	1	0
2	1	2	8041/3: Small cell carcinoma, NOS	4	3	0	0	0	0
2	1	1	8041/3: Small cell carcinoma, NOS	3	3	0	0	0	0
2	1	1	8041/3: Small cell carcinoma, NOS	4	3	1	0	0	0
2	1	1	8041/3: Small cell carcinoma, NOS	1	3	1	0	1	1
2	1	2	8041/3: Small cell carcinoma, NOS	4	3	0	0	0	0
2	1	1	8041/3: Small cell carcinoma, NOS	3	3	0	0	0	0
2	1	2	8041/3: Small cell carcinoma, NOS	3	3	0	0	0	0
2	1	2	8041/3: Small cell carcinoma, NOS	3	3	0	1	0	0
2	1	2	8041/3: Small cell carcinoma, NOS	3	3	0	0	1	0
2	1	2	8041/3: Small cell carcinoma, NOS	4	3	1	0	1	1
2	1	1	8041/3: Small cell carcinoma, NOS	3	3	0	0	1	0
2	1	1	8041/3: Small cell carcinoma, NOS	4	3	0	0	0	1
2	1	1	8041/3: Small cell carcinoma, NOS	3	3	1	0	1	1
2	1	2	8041/3: Small cell carcinoma, NOS	4	3	0	0	1	0
2	1	1	8041/3: Small cell carcinoma, NOS	4	3	0	0	1	1
2	1	1	8041/3: Small cell carcinoma, NOS	3	3	0	0	0	0
2	1	2	8041/3: Small cell carcinoma, NOS	3	3	1	0	0	0
2	1	1	8041/3: Small cell carcinoma, NOS	1	3	1	1	0	1
1	1	2	8041/3: Small cell carcinoma, NOS	3	3	0	0	0	0
1	1	2	8041/3: Small cell carcinoma, NOS	3	3	0	0	1	0
1	1	2	8041/3: Small cell carcinoma, NOS	3	3	0	0	0	0
1	1	1	8041/3: Small cell carcinoma, NOS	3	3	0	1	1	0
1	1	2	8041/3: Small cell carcinoma, NOS	3	3	1	0	0	0
1	1	1	8041/3: Small cell carcinoma, NOS	3	3	0	0	1	0
1	1	2	8041/3: Small cell carcinoma, NOS	4	3	0	1	0	1
1	1	1	8041/3: Small cell carcinoma, NOS	3	3	0	1	0	1
1	1	1	8041/3: Small cell carcinoma, NOS	3	3	0	0	1	0
1	1	2	8041/3: Small cell carcinoma, NOS	3	3	1	1	1	0
1	1	1	8041/3: Small cell carcinoma, NOS	1	3	0	0	0	1
2	1	1	8041/3: Small cell carcinoma, NOS	4	3	0	0	0	0
2	1	1	8041/3: Small cell carcinoma, NOS	3	3	0	0	0	0
2	1	1	8041/3: Small cell carcinoma, NOS	3	3	0	1	0	0
2	1	2	8041/3: Small cell carcinoma, NOS	3	3	1	0	1	0
2	1	1	8041/3: Small cell carcinoma, NOS	3	3	1	0	1	0
2	1	2	8041/3: Small cell carcinoma, NOS	3	3	0	0	0	1
2	1	2	8041/3: Small cell carcinoma, NOS	1	3	0	0	0	0
2	1	2	8041/3: Small cell carcinoma, NOS	3	3	0	1	0	0
2	1	2	8041/3: Small cell carcinoma, NOS	3	3	0	0	1	0
2	1	1	8041/3: Small cell carcinoma, NOS	3	3	0	0	1	0
2	1	1	8041/3: Small cell carcinoma, NOS	3	3	1	0	1	0
2	1	2	8041/3: Small cell carcinoma, NOS	3	3	1	0	0	1
2	1	2	8041/3: Small cell carcinoma, NOS	3	3	1	0	0	1
2	1	2	8041/3: Small cell carcinoma, NOS	3	3	1	0	1	1
2	1	1	8041/3: Small cell carcinoma, NOS	3	3	0	0	0	0
2	1	1	8041/3: Small cell carcinoma, NOS	3	3	1	0	0	0
2	1	1	8041/3: Small cell carcinoma, NOS	2	3	0	0	0	0
2	1	2	8041/3: Small cell carcinoma, NOS	2	3	1	0	0	0
2	1	1	8041/3: Small cell carcinoma, NOS	3	3	0	0	1	1
1	1	2	8041/3: Small cell carcinoma, NOS	3	3	0	1	0	0
1	1	1	8041/3: Small cell carcinoma, NOS	4	3	1	0	1	0
1	1	1	8041/3: Small cell carcinoma, NOS	3	3	0	0	0	0
1	1	1	8041/3: Small cell carcinoma, NOS	4	3	0	1	0	0
1	1	1	8041/3: Small cell carcinoma, NOS	3	3	0	0	0	0
1	1	1	8041/3: Small cell carcinoma, NOS	3	3	0	0	0	0
1	1	2	8041/3: Small cell carcinoma, NOS	3	3	0	0	0	0
1	1	2	8041/3: Small cell carcinoma, NOS	1	3	0	0	0	0
1	1	2	8041/3: Small cell carcinoma, NOS	3	3	1	0	0	0
1	1	2	8041/3: Small cell carcinoma, NOS	3	3	1	0	0	0
1	1	1	8041/3: Small cell carcinoma, NOS	3	3	0	0	1	0
1	1	2	8041/3: Small cell carcinoma, NOS	4	3	0	0	0	1
2	1	1	8041/3: Small cell carcinoma, NOS	3	3	0	0	1	0
2	1	2	8041/3: Small cell carcinoma, NOS	4	3	0	0	0	1
2	1	2	8041/3: Small cell carcinoma, NOS	3	3	1	0	1	1
2	1	2	8041/3: Small cell carcinoma, NOS	4	3	0	0	0	0
2	1	2	8041/3: Small cell carcinoma, NOS	4	3	0	1	0	0
2	1	1	8041/3: Small cell carcinoma, NOS	4	3	0	0	1	0
2	1	1	8041/3: Small cell carcinoma, NOS	1	3	0	0	1	0
2	1	2	8041/3: Small cell carcinoma, NOS	4	3	0	0	0	1
2	1	1	8041/3: Small cell carcinoma, NOS	3	3	0	0	1	0
2	1	1	8041/3: Small cell carcinoma, NOS	4	3	0	0	1	0
2	1	1	8041/3: Small cell carcinoma, NOS	4	3	1	0	1	1
2	1	1	8041/3: Small cell carcinoma, NOS	3	3	1	0	1	0
1	1	2	8041/3: Small cell carcinoma, NOS	4	3	0	1	0	0
1	1	1	8041/3: Small cell carcinoma, NOS	1	3	0	1	0	0
1	1	2	8041/3: Small cell carcinoma, NOS	3	3	0	0	0	0
1	1	2	8041/3: Small cell carcinoma, NOS	4	3	1	0	1	0
1	1	2	8041/3: Small cell carcinoma, NOS	3	3	1	1	1	0
1	1	1	8041/3: Small cell carcinoma, NOS	4	3	0	0	0	1
1	1	2	8041/3: Small cell carcinoma, NOS	4	3	0	0	0	1
1	1	2	8041/3: Small cell carcinoma, NOS	3	3	0	0	1	1
1	1	2	8041/3: Small cell carcinoma, NOS	4	3	0	0	0	0
1	1	2	8041/3: Small cell carcinoma, NOS	1	3	0	0	0	0
1	1	1	8041/3: Small cell carcinoma, NOS	1	3	0	0	0	0
1	1	2	8041/3: Small cell carcinoma, NOS	4	3	1	0	0	0
1	1	2	8041/3: Small cell carcinoma, NOS	3	3	1	0	0	0
1	1	2	8041/3: Small cell carcinoma, NOS	3	3	1	0	0	0
1	1	2	8041/3: Small cell carcinoma, NOS	3	3	0	1	0	0
1	1	2	8041/3: Small cell carcinoma, NOS	3	3	0	1	0	0
1	1	2	8041/3: Small cell carcinoma, NOS	3	3	1	1	0	0
1	1	1	8041/3: Small cell carcinoma, NOS	4	3	0	0	1	0
1	1	1	8041/3: Small cell carcinoma, NOS	3	3	0	0	1	0
1	1	2	8041/3: Small cell carcinoma, NOS	3	3	0	0	1	0
1	1	2	8041/3: Small cell carcinoma, NOS	3	3	0	0	1	0
1	1	1	8041/3: Small cell carcinoma, NOS	4	3	1	0	1	0
1	1	2	8041/3: Small cell carcinoma, NOS	3	3	0	1	1	0
1	1	2	8041/3: Small cell carcinoma, NOS	3	3	0	1	1	0
1	1	1	8041/3: Small cell carcinoma, NOS	3	3	0	1	1	0
1	1	2	8041/3: Small cell carcinoma, NOS	3	3	0	0	0	1
1	1	1	8041/3: Small cell carcinoma, NOS	1	3	0	0	0	1
1	1	2	8041/3: Small cell carcinoma, NOS	3	3	0	1	0	1
1	1	1	8041/3: Small cell carcinoma, NOS	3	3	0	1	0	1
1	1	1	8041/3: Small cell carcinoma, NOS	3	3	1	1	0	1
1	1	1	8041/3: Small cell carcinoma, NOS	1	3	0	0	1	1
1	1	2	8041/3: Small cell carcinoma, NOS	3	3	1	0	1	1
1	1	2	8041/3: Small cell carcinoma, NOS	4	3	0	0	0	0
1	1	2	8041/3: Small cell carcinoma, NOS	4	3	0	0	0	0
1	1	2	8041/3: Small cell carcinoma, NOS	4	3	0	0	0	0
1	1	1	8041/3: Small cell carcinoma, NOS	4	3	0	0	0	0
1	1	2	8041/3: Small cell carcinoma, NOS	3	3	0	0	0	0
1	1	2	8041/3: Small cell carcinoma, NOS	3	3	0	0	0	0
1	1	2	8041/3: Small cell carcinoma, NOS	1	3	0	0	0	0
1	1	2	8041/3: Small cell carcinoma, NOS	3	3	1	0	0	0
1	1	1	8041/3: Small cell carcinoma, NOS	4	3	0	1	0	0
1	1	1	8041/3: Small cell carcinoma, NOS	3	3	0	1	0	0
1	1	1	8041/3: Small cell carcinoma, NOS	4	3	1	1	0	0
1	1	2	8041/3: Small cell carcinoma, NOS	4	3	1	1	0	0
1	1	1	8041/3: Small cell carcinoma, NOS	3	3	0	0	1	0
1	1	2	8041/3: Small cell carcinoma, NOS	3	3	0	0	1	0
1	1	1	8041/3: Small cell carcinoma, NOS	1	3	0	0	1	0
1	1	1	8041/3: Small cell carcinoma, NOS	4	3	1	0	1	0
1	1	1	8041/3: Small cell carcinoma, NOS	4	3	1	0	1	0
1	1	1	8041/3: Small cell carcinoma, NOS	4	3	1	0	1	0
1	1	2	8041/3: Small cell carcinoma, NOS	3	3	1	0	1	0
1	1	1	8041/3: Small cell carcinoma, NOS	3	3	1	0	1	0
1	1	2	8041/3: Small cell carcinoma, NOS	3	3	1	0	1	0
1	1	2	8041/3: Small cell carcinoma, NOS	3	3	0	0	0	1
1	1	1	8041/3: Small cell carcinoma, NOS	2	3	0	0	1	1
1	1	1	8041/3: Small cell carcinoma, NOS	3	3	1	0	1	1
1	1	2	8041/3: Small cell carcinoma, NOS	3	3	1	0	1	1
1	1	2	8041/3: Small cell carcinoma, NOS	3	3	1	0	1	1
1	1	2	8041/3: Small cell carcinoma, NOS	4	3	1	1	1	1
1	1	1	8041/3: Small cell carcinoma, NOS	4	3	0	0	0	0
1	1	1	8041/3: Small cell carcinoma, NOS	4	3	0	0	0	0
1	1	2	8041/3: Small cell carcinoma, NOS	4	3	0	0	0	0
1	1	1	8041/3: Small cell carcinoma, NOS	4	3	0	0	0	0
1	1	1	8041/3: Small cell carcinoma, NOS	3	3	0	0	0	0
1	1	1	8041/3: Small cell carcinoma, NOS	3	3	0	0	0	0
1	1	2	8041/3: Small cell carcinoma, NOS	3	3	0	0	0	0
1	1	1	8041/3: Small cell carcinoma, NOS	3	3	0	0	0	0
1	1	1	8041/3: Small cell carcinoma, NOS	1	3	0	0	0	0
1	1	2	8041/3: Small cell carcinoma, NOS	4	3	1	0	0	0
1	1	2	8041/3: Small cell carcinoma, NOS	3	3	1	0	0	0
1	1	1	8041/3: Small cell carcinoma, NOS	3	3	1	0	0	0
1	1	2	8041/3: Small cell carcinoma, NOS	3	3	0	1	0	0
1	1	1	8041/3: Small cell carcinoma, NOS	3	3	0	1	0	0
1	1	1	8041/3: Small cell carcinoma, NOS	3	3	0	0	1	0
1	1	2	8041/3: Small cell carcinoma, NOS	3	3	0	0	1	0
1	1	2	8041/3: Small cell carcinoma, NOS	3	3	0	0	1	0
1	1	2	8041/3: Small cell carcinoma, NOS	3	3	1	0	1	0
1	1	1	8041/3: Small cell carcinoma, NOS	3	3	1	0	1	0
1	1	2	8041/3: Small cell carcinoma, NOS	3	3	1	0	1	0
1	1	1	8041/3: Small cell carcinoma, NOS	4	3	0	0	0	1
1	1	2	8041/3: Small cell carcinoma, NOS	3	3	0	0	0	1
1	1	1	8041/3: Small cell carcinoma, NOS	1	3	0	0	0	1
1	1	1	8041/3: Small cell carcinoma, NOS	4	3	1	0	0	1
1	1	2	8041/3: Small cell carcinoma, NOS	4	3	1	0	0	1
1	1	1	8041/3: Small cell carcinoma, NOS	3	3	1	1	0	1
1	1	2	8041/3: Small cell carcinoma, NOS	4	3	1	0	1	1
1	1	2	8041/3: Small cell carcinoma, NOS	3	3	1	0	1	1
1	1	1	8041/3: Small cell carcinoma, NOS	3	3	1	0	1	1
1	1	2	8041/3: Small cell carcinoma, NOS	2	3	1	0	1	1
2	1	2	8041/3: Small cell carcinoma, NOS	4	3	0	0	0	0
2	1	1	8041/3: Small cell carcinoma, NOS	4	3	0	0	0	0
2	1	2	8041/3: Small cell carcinoma, NOS	4	3	0	0	0	0
2	1	1	8041/3: Small cell carcinoma, NOS	3	3	0	0	0	0
2	1	1	8041/3: Small cell carcinoma, NOS	3	3	0	0	0	0
2	1	2	8041/3: Small cell carcinoma, NOS	3	3	0	0	0	0
2	1	2	8041/3: Small cell carcinoma, NOS	3	3	0	0	0	0
2	1	2	8041/3: Small cell carcinoma, NOS	3	3	0	0	0	0
2	1	2	8041/3: Small cell carcinoma, NOS	1	3	0	0	0	0
2	1	2	8041/3: Small cell carcinoma, NOS	3	3	1	0	0	0
2	1	2	8041/3: Small cell carcinoma, NOS	3	3	1	0	0	0
2	1	2	8041/3: Small cell carcinoma, NOS	3	3	1	0	0	0
2	1	2	8041/3: Small cell carcinoma, NOS	4	3	0	1	0	0
2	1	1	8041/3: Small cell carcinoma, NOS	3	3	0	1	0	0
2	1	2	8041/3: Small cell carcinoma, NOS	3	3	1	1	0	0
2	1	1	8041/3: Small cell carcinoma, NOS	3	3	0	0	1	0
2	1	2	8041/3: Small cell carcinoma, NOS	3	3	0	0	1	0
2	1	1	8041/3: Small cell carcinoma, NOS	3	3	0	0	1	0
2	1	1	8041/3: Small cell carcinoma, NOS	3	3	0	0	1	0
2	1	1	8041/3: Small cell carcinoma, NOS	3	3	0	0	1	0
2	1	2	8041/3: Small cell carcinoma, NOS	3	3	0	0	1	0
2	1	1	8041/3: Small cell carcinoma, NOS	3	3	0	0	1	0
2	1	2	8041/3: Small cell carcinoma, NOS	3	3	0	0	1	0
2	1	2	8041/3: Small cell carcinoma, NOS	4	3	1	0	1	0
2	1	1	8041/3: Small cell carcinoma, NOS	3	3	1	0	1	0
2	1	1	8041/3: Small cell carcinoma, NOS	1	3	1	0	1	0
2	1	1	8041/3: Small cell carcinoma, NOS	4	3	1	1	1	0
2	1	2	8041/3: Small cell carcinoma, NOS	4	3	0	0	0	1
2	1	1	8041/3: Small cell carcinoma, NOS	3	3	0	0	0	1
2	1	2	8041/3: Small cell carcinoma, NOS	3	3	1	0	1	1
2	1	2	8041/3: Small cell carcinoma, NOS	4	3	0	0	0	0
2	1	1	8041/3: Small cell carcinoma, NOS	4	3	0	0	0	0
2	1	1	8041/3: Small cell carcinoma, NOS	3	3	0	0	0	0
2	1	1	8041/3: Small cell carcinoma, NOS	3	3	0	0	0	0
2	1	2	8041/3: Small cell carcinoma, NOS	3	3	0	0	0	0
2	1	1	8041/3: Small cell carcinoma, NOS	3	3	0	0	0	0
2	1	2	8041/3: Small cell carcinoma, NOS	3	3	0	0	0	0
2	1	2	8041/3: Small cell carcinoma, NOS	3	3	0	0	0	0
2	1	1	8041/3: Small cell carcinoma, NOS	3	3	0	0	0	0
2	1	2	8041/3: Small cell carcinoma, NOS	3	3	0	0	0	0
2	1	2	8041/3: Small cell carcinoma, NOS	1	3	0	0	0	0
2	1	1	8041/3: Small cell carcinoma, NOS	4	3	1	0	0	0
2	1	1	8041/3: Small cell carcinoma, NOS	3	3	1	0	0	0
2	1	2	8041/3: Small cell carcinoma, NOS	3	3	1	0	0	0
2	1	2	8041/3: Small cell carcinoma, NOS	3	3	0	1	0	0
2	1	2	8041/3: Small cell carcinoma, NOS	3	3	0	1	0	0
2	1	2	8041/3: Small cell carcinoma, NOS	2	3	0	1	0	0
2	1	2	8041/3: Small cell carcinoma, NOS	1	3	1	1	0	0
2	1	1	8041/3: Small cell carcinoma, NOS	4	3	0	0	1	0
2	1	2	8041/3: Small cell carcinoma, NOS	3	3	0	0	1	0
2	1	1	8041/3: Small cell carcinoma, NOS	3	3	0	0	1	0
2	1	1	8041/3: Small cell carcinoma, NOS	3	3	0	0	1	0
2	1	1	8041/3: Small cell carcinoma, NOS	3	3	0	0	1	0
2	1	1	8041/3: Small cell carcinoma, NOS	3	3	0	0	1	0
2	1	2	8041/3: Small cell carcinoma, NOS	1	3	0	0	1	0
2	1	2	8041/3: Small cell carcinoma, NOS	1	3	1	0	1	0
2	1	1	8041/3: Small cell carcinoma, NOS	3	3	1	1	1	0
2	1	2	8041/3: Small cell carcinoma, NOS	4	3	0	0	0	1
2	1	1	8041/3: Small cell carcinoma, NOS	4	3	0	0	1	1
2	1	2	8041/3: Small cell carcinoma, NOS	3	3	0	0	1	1
2	1	1	8041/3: Small cell carcinoma, NOS	3	3	1	0	1	1
2	1	1	8041/3: Small cell carcinoma, NOS	1	3	1	0	1	1
2	1	1	8041/3: Small cell carcinoma, NOS	3	3	0	0	0	0
2	1	2	8041/3: Small cell carcinoma, NOS	3	3	0	0	0	0
2	1	1	8041/3: Small cell carcinoma, NOS	3	3	0	0	0	0
2	1	1	8041/3: Small cell carcinoma, NOS	3	3	0	0	0	0
2	1	1	8041/3: Small cell carcinoma, NOS	2	3	0	0	0	0
2	1	2	8041/3: Small cell carcinoma, NOS	4	3	0	0	1	0
2	1	1	8041/3: Small cell carcinoma, NOS	2	3	0	0	1	0
2	1	2	8041/3: Small cell carcinoma, NOS	4	3	1	0	1	0
2	1	2	8041/3: Small cell carcinoma, NOS	4	3	0	0	0	1
2	1	2	8041/3: Small cell carcinoma, NOS	4	3	0	0	0	1
2	1	1	8041/3: Small cell carcinoma, NOS	4	3	0	0	0	1
2	1	1	8041/3: Small cell carcinoma, NOS	3	3	0	0	0	1
2	1	1	8041/3: Small cell carcinoma, NOS	3	3	0	0	1	1
2	1	1	8041/3: Small cell carcinoma, NOS	3	3	0	0	1	1
2	1	1	8041/3: Small cell carcinoma, NOS	4	3	1	0	1	1
2	1	2	8041/3: Small cell carcinoma, NOS	3	3	1	0	1	1
2	1	1	8041/3: Small cell carcinoma, NOS	3	3	1	1	1	1
2	1	1	8041/3: Small cell carcinoma, NOS	3	3	0	0	0	0
2	1	2	8041/3: Small cell carcinoma, NOS	4	3	1	0	0	0
2	1	1	8041/3: Small cell carcinoma, NOS	3	3	1	0	0	0
2	1	1	8041/3: Small cell carcinoma, NOS	3	3	0	0	1	0
2	1	2	8041/3: Small cell carcinoma, NOS	3	3	0	0	1	0
2	1	2	8041/3: Small cell carcinoma, NOS	2	3	0	0	1	0
2	1	2	8041/3: Small cell carcinoma, NOS	1	3	1	0	1	0
2	1	1	8041/3: Small cell carcinoma, NOS	3	3	0	0	0	1
2	1	1	8041/3: Small cell carcinoma, NOS	4	3	0	0	0	0
2	1	1	8041/3: Small cell carcinoma, NOS	3	3	0	0	0	0
2	1	1	8041/3: Small cell carcinoma, NOS	3	3	0	0	0	0
2	1	1	8041/3: Small cell carcinoma, NOS	2	3	0	1	0	0
2	1	2	8041/3: Small cell carcinoma, NOS	3	3	0	0	1	0
2	1	1	8041/3: Small cell carcinoma, NOS	3	3	0	0	1	1
1	1	2	8041/3: Small cell carcinoma, NOS	3	3	1	1	0	0
1	1	2	8041/3: Small cell carcinoma, NOS	3	3	1	0	1	0
1	1	2	8041/3: Small cell carcinoma, NOS	3	3	0	0	1	1
1	1	1	8041/3: Small cell carcinoma, NOS	4	3	0	0	0	0
1	1	1	8041/3: Small cell carcinoma, NOS	4	3	0	1	0	0
1	1	2	8041/3: Small cell carcinoma, NOS	3	3	0	0	1	0
1	1	2	8041/3: Small cell carcinoma, NOS	3	3	1	1	1	0
2	1	2	8041/3: Small cell carcinoma, NOS	3	3	0	0	1	0
2	1	2	8041/3: Small cell carcinoma, NOS	3	3	0	0	1	0
2	1	2	8041/3: Small cell carcinoma, NOS	3	3	1	0	1	0
2	1	2	8041/3: Small cell carcinoma, NOS	3	3	1	0	0	0
2	1	1	8041/3: Small cell carcinoma, NOS	3	3	1	1	0	0
2	1	2	8041/3: Small cell carcinoma, NOS	3	3	0	1	0	0
1	1	1	8041/3: Small cell carcinoma, NOS	1	3	0	1	0	0
1	1	2	8041/3: Small cell carcinoma, NOS	4	3	1	0	0	0
1	1	1	8041/3: Small cell carcinoma, NOS	3	3	0	0	1	0
1	1	2	8041/3: Small cell carcinoma, NOS	3	3	0	0	1	1
1	1	2	8041/3: Small cell carcinoma, NOS	3	3	1	0	1	0
1	1	2	8041/3: Small cell carcinoma, NOS	3	3	1	0	1	0
1	1	2	8041/3: Small cell carcinoma, NOS	4	3	0	1	1	0
1	1	1	8041/3: Small cell carcinoma, NOS	3	3	0	0	0	1
1	1	2	8041/3: Small cell carcinoma, NOS	3	3	1	0	1	1
1	1	2	8041/3: Small cell carcinoma, NOS	3	3	1	0	1	1
2	1	2	8041/3: Small cell carcinoma, NOS	4	3	0	0	0	0
2	1	2	8041/3: Small cell carcinoma, NOS	3	3	1	1	1	0
2	1	2	8041/3: Small cell carcinoma, NOS	1	3	0	0	0	1
2	1	1	8041/3: Small cell carcinoma, NOS	3	3	0	0	0	0
2	1	1	8041/3: Small cell carcinoma, NOS	3	3	0	0	0	0
2	1	2	8041/3: Small cell carcinoma, NOS	3	3	1	0	1	0
2	1	1	8041/3: Small cell carcinoma, NOS	3	3	1	0	1	0
2	1	2	8041/3: Small cell carcinoma, NOS	2	3	0	1	0	1
2	1	1	8041/3: Small cell carcinoma, NOS	4	3	0	0	0	0
2	1	2	8041/3: Small cell carcinoma, NOS	2	3	0	0	1	0
2	1	2	8041/3: Small cell carcinoma, NOS	1	3	0	1	0	1
2	1	2	8041/3: Small cell carcinoma, NOS	4	3	0	0	0	0
2	1	2	8041/3: Small cell carcinoma, NOS	3	3	0	0	1	0
1	1	2	8041/3: Small cell carcinoma, NOS	1	3	1	0	0	0
1	1	2	8041/3: Small cell carcinoma, NOS	4	3	1	0	1	0
1	1	1	8041/3: Small cell carcinoma, NOS	4	3	0	0	0	0
1	1	2	8041/3: Small cell carcinoma, NOS	3	3	0	0	0	0
1	1	2	8041/3: Small cell carcinoma, NOS	3	3	0	1	0	0
1	1	2	8041/3: Small cell carcinoma, NOS	3	3	0	0	0	0
1	1	1	8041/3: Small cell carcinoma, NOS	3	3	0	0	0	0
1	1	2	8041/3: Small cell carcinoma, NOS	3	3	1	0	0	0
1	1	2	8041/3: Small cell carcinoma, NOS	3	3	0	1	0	0
1	1	2	8041/3: Small cell carcinoma, NOS	3	3	0	1	0	0
1	1	2	8041/3: Small cell carcinoma, NOS	3	3	0	1	0	0
2	1	2	8041/3: Small cell carcinoma, NOS	1	3	0	1	0	0
2	1	2	8041/3: Small cell carcinoma, NOS	3	3	0	0	1	0
2	1	2	8041/3: Small cell carcinoma, NOS	3	3	1	0	1	0
2	1	2	8041/3: Small cell carcinoma, NOS	4	3	0	1	1	0
2	1	2	8041/3: Small cell carcinoma, NOS	3	3	0	0	0	1
2	1	2	8041/3: Small cell carcinoma, NOS	4	3	0	0	0	0
2	1	2	8041/3: Small cell carcinoma, NOS	3	3	1	0	1	0
2	1	1	8041/3: Small cell carcinoma, NOS	4	3	1	0	1	1
1	1	2	8041/3: Small cell carcinoma, NOS	3	3	1	0	0	0
1	1	1	8041/3: Small cell carcinoma, NOS	3	3	0	0	1	0
1	1	1	8041/3: Small cell carcinoma, NOS	3	3	1	0	1	0
1	1	1	8041/3: Small cell carcinoma, NOS	3	3	0	1	0	0
1	1	2	8041/3: Small cell carcinoma, NOS	3	3	0	0	0	1
1	1	1	8041/3: Small cell carcinoma, NOS	4	3	0	0	0	0
1	1	1	8041/3: Small cell carcinoma, NOS	3	3	1	0	0	0
1	1	2	8041/3: Small cell carcinoma, NOS	3	3	1	0	0	0
1	1	2	8041/3: Small cell carcinoma, NOS	1	3	1	0	0	0
1	1	1	8041/3: Small cell carcinoma, NOS	3	3	0	1	0	1
2	1	2	8041/3: Small cell carcinoma, NOS	1	3	0	1	0	0
2	1	1	8041/3: Small cell carcinoma, NOS	3	3	1	0	1	0
2	1	1	8041/3: Small cell carcinoma, NOS	3	3	1	0	1	0
2	1	1	8041/3: Small cell carcinoma, NOS	4	3	0	0	0	1
2	1	2	8041/3: Small cell carcinoma, NOS	3	3	0	0	0	0
2	1	2	8041/3: Small cell carcinoma, NOS	2	3	0	0	0	0
2	1	1	8041/3: Small cell carcinoma, NOS	3	3	0	0	0	1
2	1	2	8041/3: Small cell carcinoma, NOS	1	3	0	0	0	0
2	1	1	8041/3: Small cell carcinoma, NOS	3	3	0	0	0	0
1	1	2	8041/3: Small cell carcinoma, NOS	3	3	0	0	1	0
1	1	2	8041/3: Small cell carcinoma, NOS	3	3	1	0	1	0
1	1	2	8041/3: Small cell carcinoma, NOS	3	3	0	0	0	0
1	1	2	8041/3: Small cell carcinoma, NOS	2	3	0	1	1	0
1	1	2	8041/3: Small cell carcinoma, NOS	2	3	0	0	0	1
1	1	2	8041/3: Small cell carcinoma, NOS	3	3	0	0	1	1
1	1	1	8041/3: Small cell carcinoma, NOS	1	3	0	0	0	0
1	1	1	8041/3: Small cell carcinoma, NOS	1	3	0	0	0	1
1	1	1	8041/3: Small cell carcinoma, NOS	4	3	0	0	1	0
1	1	1	8041/3: Small cell carcinoma, NOS	3	3	0	0	1	0
2	1	2	8041/3: Small cell carcinoma, NOS	1	3	1	0	0	0
2	1	1	8041/3: Small cell carcinoma, NOS	2	3	0	1	0	0
2	1	1	8041/3: Small cell carcinoma, NOS	3	3	1	1	0	0
2	1	2	8041/3: Small cell carcinoma, NOS	4	3	1	0	1	0
2	1	2	8041/3: Small cell carcinoma, NOS	3	3	1	0	1	0
2	1	1	8041/3: Small cell carcinoma, NOS	3	3	0	0	0	0
2	1	1	8041/3: Small cell carcinoma, NOS	3	3	0	0	0	0
2	1	2	8041/3: Small cell carcinoma, NOS	1	3	1	0	1	1
2	1	1	8041/3: Small cell carcinoma, NOS	3	3	0	1	1	1
2	1	2	8041/3: Small cell carcinoma, NOS	1	3	0	0	0	0
2	1	1	8041/3: Small cell carcinoma, NOS	1	3	0	0	0	0
2	1	1	8041/3: Small cell carcinoma, NOS	4	3	1	0	1	0
2	1	1	8041/3: Small cell carcinoma, NOS	3	3	0	1	1	0
2	1	2	8041/3: Small cell carcinoma, NOS	4	3	0	0	0	1
2	1	2	8041/3: Small cell carcinoma, NOS	3	3	0	0	0	1
2	1	1	8041/3: Small cell carcinoma, NOS	1	3	0	0	0	0
2	1	2	8041/3: Small cell carcinoma, NOS	3	3	0	1	0	0
2	1	2	8041/3: Small cell carcinoma, NOS	3	3	1	0	1	1
2	1	2	8041/3: Small cell carcinoma, NOS	4	3	1	0	1	0
1	1	2	8041/3: Small cell carcinoma, NOS	4	3	1	0	1	0
1	1	2	8041/3: Small cell carcinoma, NOS	4	3	0	0	0	0
1	1	2	8041/3: Small cell carcinoma, NOS	3	3	0	0	0	0
1	1	2	8041/3: Small cell carcinoma, NOS	4	3	0	0	1	0
1	1	1	8041/3: Small cell carcinoma, NOS	3	3	0	0	1	0
2	1	2	8041/3: Small cell carcinoma, NOS	2	3	1	0	0	0
2	1	2	8041/3: Small cell carcinoma, NOS	3	3	1	0	0	1
2	1	1	8041/3: Small cell carcinoma, NOS	4	3	0	0	0	0
2	1	1	8041/3: Small cell carcinoma, NOS	3	3	0	0	0	0
2	1	1	8041/3: Small cell carcinoma, NOS	3	3	0	0	0	0
2	1	1	8041/3: Small cell carcinoma, NOS	4	3	0	0	1	0
2	1	2	8041/3: Small cell carcinoma, NOS	3	3	1	0	1	0
2	1	2	8041/3: Small cell carcinoma, NOS	4	3	1	0	1	1
2	1	1	8041/3: Small cell carcinoma, NOS	3	3	0	0	0	0
2	1	2	8041/3: Small cell carcinoma, NOS	3	3	0	0	1	0
1	1	1	8041/3: Small cell carcinoma, NOS	3	3	0	0	0	1
1	1	2	8041/3: Small cell carcinoma, NOS	2	3	1	1	0	1
1	1	2	8041/3: Small cell carcinoma, NOS	4	3	0	0	0	0
[truncated: 9,059 more rows]
